# Supplementary material for: Rational synthesis of Pd nanoparticle-embedded reduced graphene oxide frameworks with enhanced selective catalysis in water
Source: Royal Society of Chemistry journal article supplement (doi:10.1039/c5nr07835k), 2015-12-24

## Supporting Information

# Rational Synthesis of Pd Nanoparticles-Embedded **Reduced** Graphene Oxide Frameworks with Enhanced Selective Catalysis in Water

Jian Liu, Guowen Hu, Yanmei Yang, Haoli Zhang, Wei Zuo, and Baodui Wang\*

Jian Liu, Guowen Hu, Yanmei Yang, Haoli Zhang, Wei Zuo, Weisheng Liu, and Baodui Wang\*

Key Laboratory of Nonferrous Metal Chemistry and Resources Utilization of Gansu Province, State Key Laboratory of Applied Organic Chemistry, and Key Laboratory of Special Function Materials and Structure Design, Ministry of Education, Lanzhou University Gansu, Lanzhou, 730000, P. R. China.

E-mail: wangbd@lzu.edu.cn.

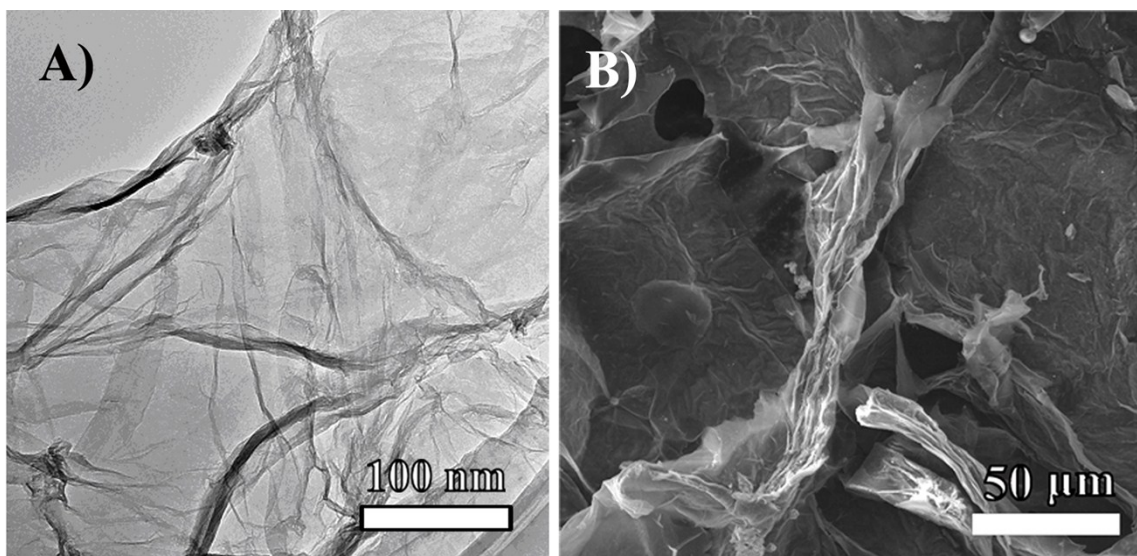

**Figure S1.** TEM (A) and SEM (B) images of GO-GOOH.

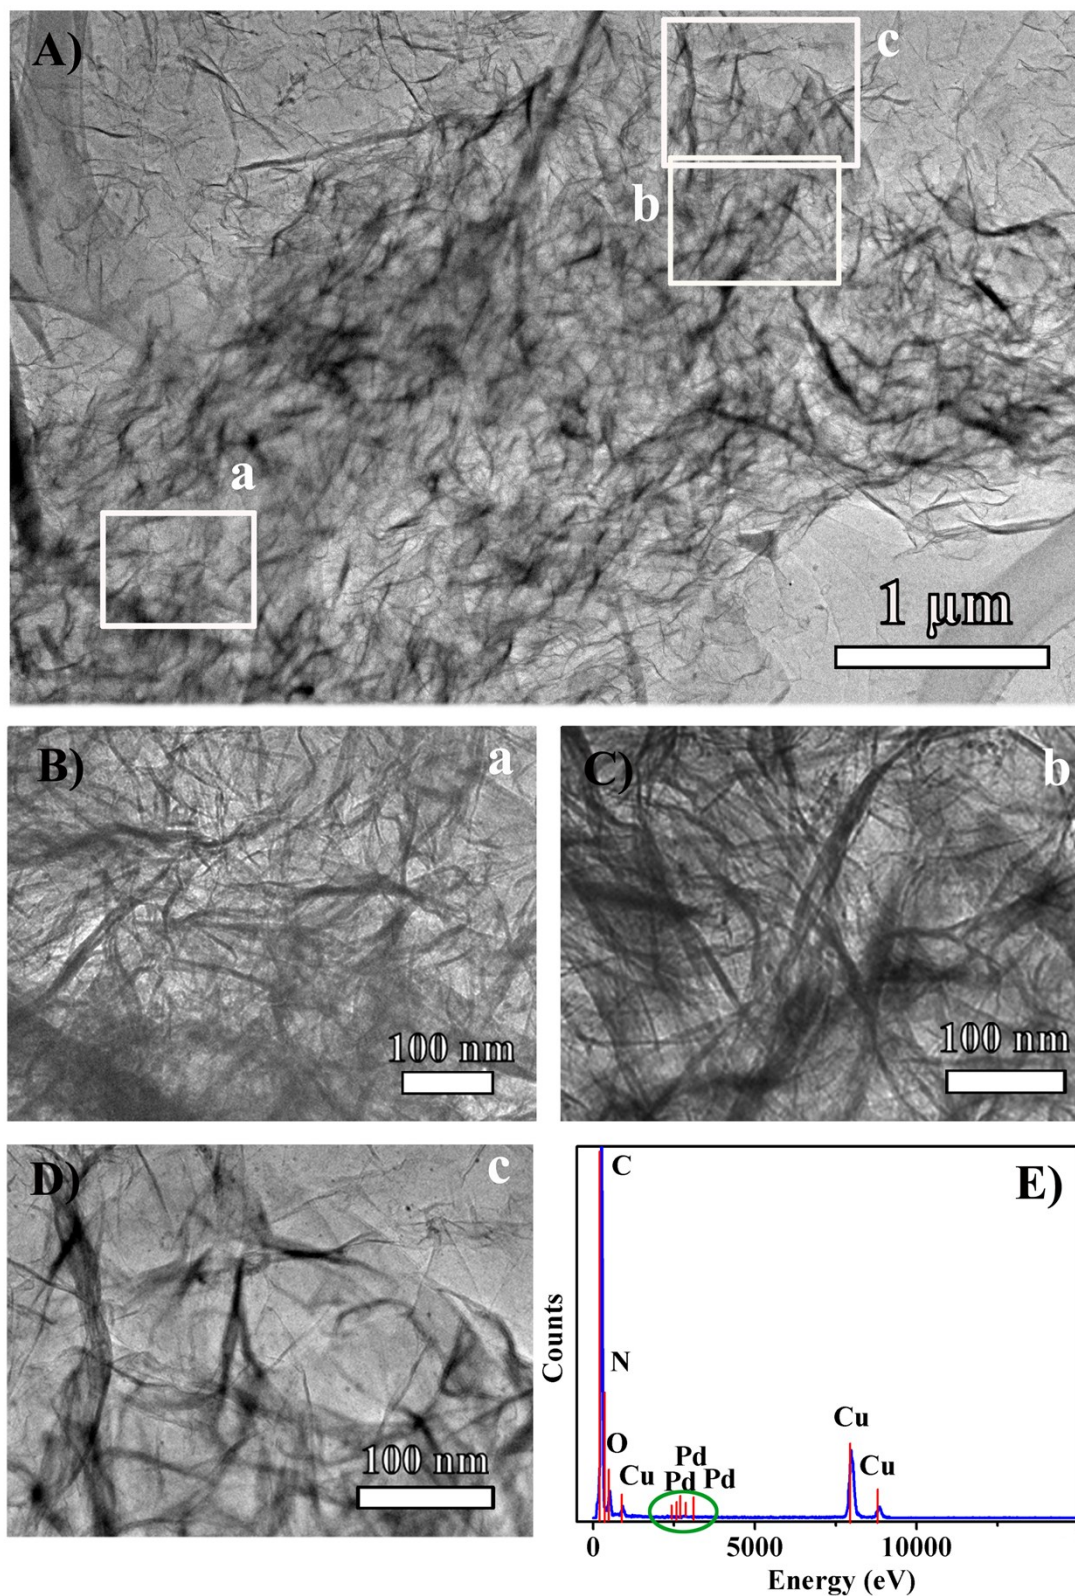

**Figure S2.** (A~D) TEM images of GOF; (E) the typical EDX pattern of GOF.

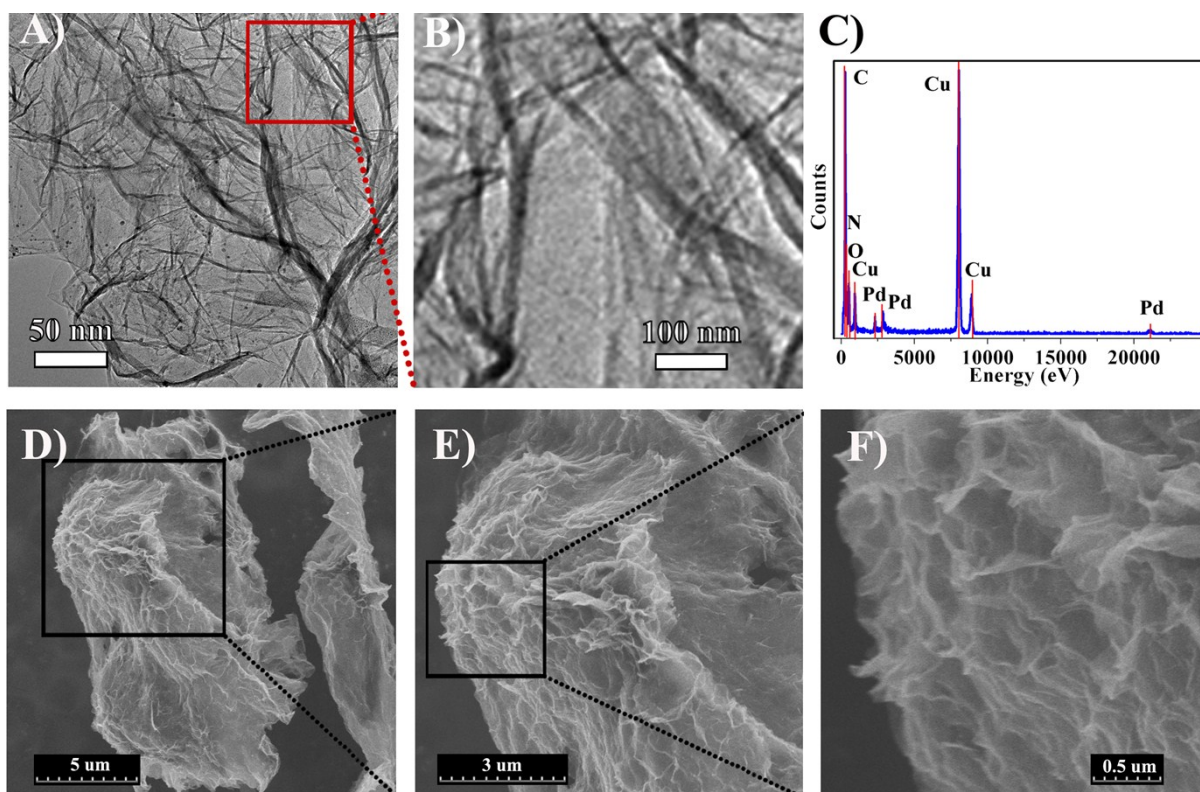

**Figure S3.** (A, B) TEM images, (C) the typical EDX pattern, and (D~F) SEM images of Pd<sup>2+</sup>-GOF.

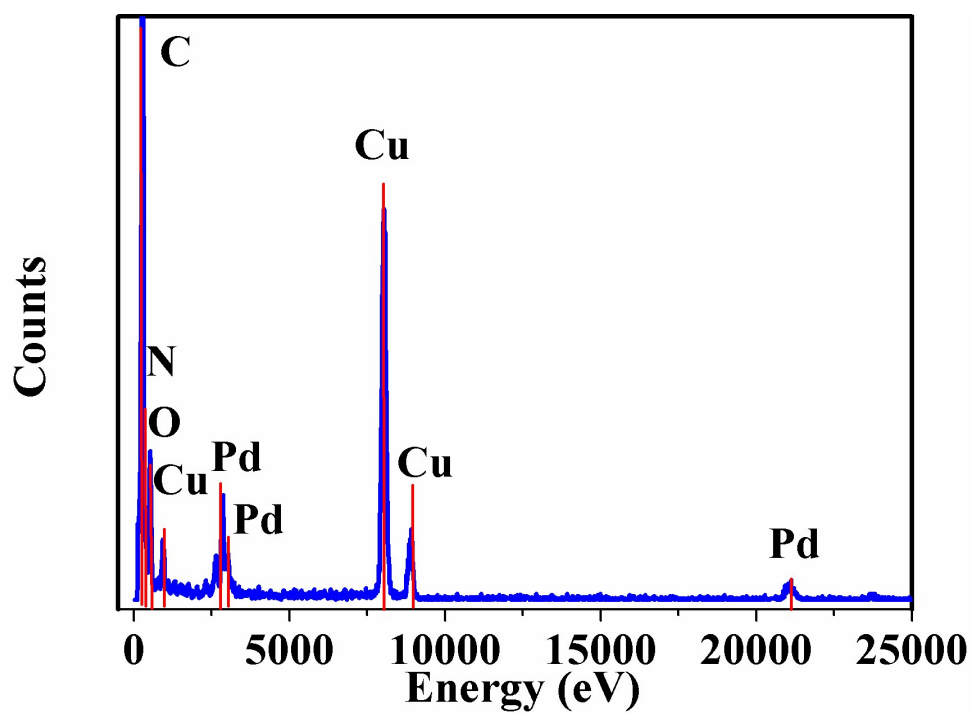

**Figure S4.** The typical EDX pattern of Pd-rGOF.



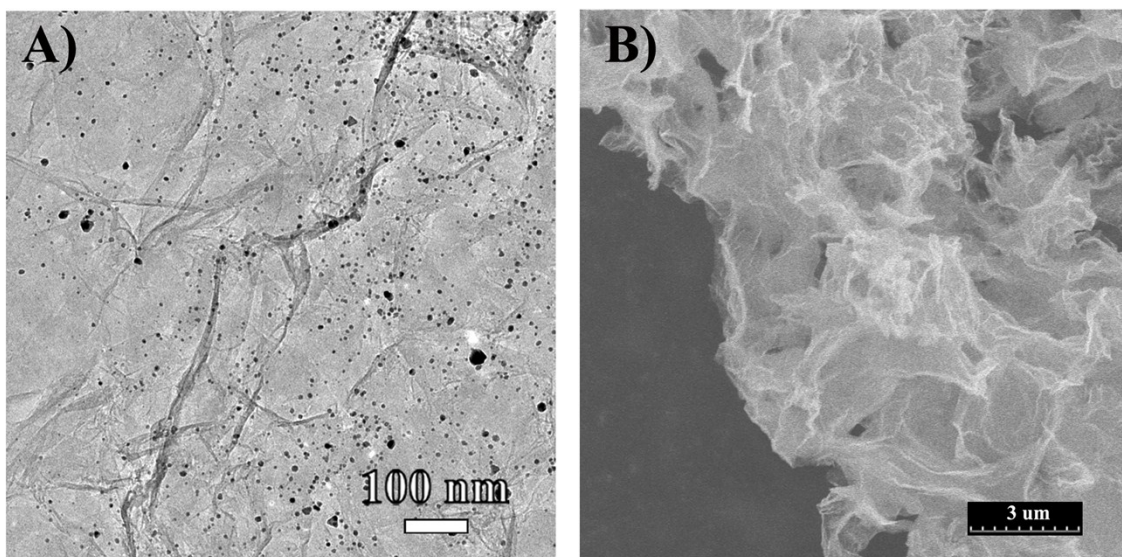

**Figure S5.** (A) TEM images and (B) SEM images of Pd-rGO after 10 th cycles.

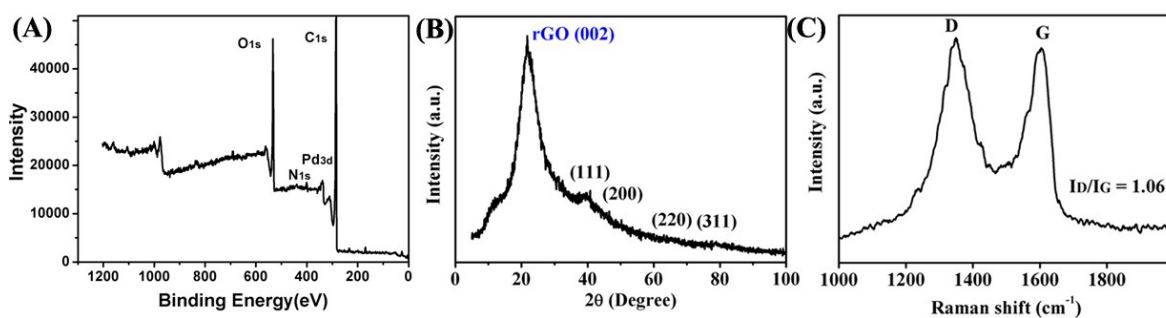

**Figure S6.** (A) XPS spectrum wide scan, (B) XRD pattern, and (C) Raman spectrum of Pd-rGO of the 3D Pd-rGO after 10 th cycles. Inset of D shows the pore size distribution of the 3D Pd-rGO.

**Table S1** The optimal condition choice of Tsuji-Trost reaction using Pd/TETA/CGO catalyst in H<sub>2</sub>O and air.<sup>a</sup>

| Entry           | Pd( $\mu\text{mol}$ ) | PPh <sub>3</sub> ( $\mu\text{mol}$ ) | T( $^{\circ}\text{C}$ ) | Yield (%) <sup>b</sup> | 3 : 4 (%) <sup>b</sup> |
|-----------------|-----------------------|--------------------------------------|-------------------------|------------------------|------------------------|
| 1               | 1.4                   | 0                                    | 100                     | 21                     | 100:0                  |
| 2               | 1.4                   | 3.5                                  | 100                     | 38                     | 75:25                  |
| 3               | 1.4                   | 7.0                                  | 100                     | >99                    | 0:100                  |
| 4               | 1.4                   | 10.5                                 | 100                     | 63                     | 70:30                  |
| 5               | 0                     | 7.0                                  | 100                     | 0                      | -                      |
| 6               | 1.4                   | 7.0                                  | 90                      | >99                    | 20:80                  |
| 7               | 1.4                   | 7.0                                  | 80                      | 70                     | 80:20                  |
| 8               | 1.4                   | 7.0                                  | 70                      | 50                     | 80:20                  |
| 9 <sup>c</sup>  | 1.4                   | 0                                    | 70                      | 63                     | 100:0                  |
| 10 <sup>d</sup> | 1.4                   | 7.0                                  | 70                      | 70                     | 80:20                  |
| 11 <sup>e</sup> | 1.4                   | 7.0                                  | 100                     | 0                      | -                      |

<sup>a</sup> Reaction condition: **1** (2.0 mmol), **2** (5.0 mmol), H<sub>2</sub>O (3.0 mL), 0.5 h.

<sup>b</sup> Yields of isolated products and determined by <sup>1</sup>H-NMR, <sup>13</sup>C-NMR. Tetramethylsilane was used as an internal standard. <sup>c, d</sup> K<sub>2</sub>CO<sub>3</sub> (2.5 mmol) was added. <sup>e</sup> **2** was blank.

**Table S2** Tsuji-Trost reaction of various 1,3-dicarbonyl compounds with allyl ethyl carbonate in H<sub>2</sub>O and air.<sup>a</sup>

| Entry | 1,3-Dicarbonyl | Catalyst | Time (h) | Mono-:Di- | Yield (%) <sup>b</sup> |
|-------|----------------|----------|----------|-----------|------------------------|
| 1     |                | Pd-GOF   | 0.5      | 0:100     | >99                    |
| 2     |                | Pd/C     | 0.5      | 35:65     | 60                     |
| 3     |                | Pd-GOF   | 0.5      | 0:100     | >99                    |
| 4     |                | Pd/C     | 0.5      | 20:80     | 61                     |
| 5     |                | Pd-GOF   | 1.0      | 0:100     | >99                    |
| 6     |                | Pd/C     | 1.0      | 45:55     | 58                     |
| 7     |                | Pd-GOF   | 1.0      | 0:100     | >99                    |
| 8     |                | Pd/C     | 1.0      | 41:59     | 67                     |
| 9     |                | Pd-GOF   | 1.5      | 0:100     | 90                     |
| 10    |                | Pd/C     | 1.5      | 0:100     | 64                     |
| 11    |                | Pd-GOF   | 1.0      | 100:0     | 90                     |
| 12    |                | Pd/C     | 1.0      | 100:0     | 40                     |
| 13    |                | Pd-GOF   | 1.5      | 100:0     | 90                     |
| 14    |                | Pd/C     | 1.5      | 100:0     | 60                     |
| 15    |                | Pd-GOF   | 2.0      | 100:0     | 60                     |
| 16    |                | Pd/C     | 2.0      | 100:0     | 35                     |

<sup>a</sup> Reaction condition: Pd-rGOF (Pd: 1.4  $\mu\text{mol}$ ), Pd/C (Pd: 1.4  $\mu\text{mol}$ ), PPh<sub>3</sub> (7.0  $\mu\text{mol}$ ), **1** (2.0 mmol), **2** (5.0 mmol), H<sub>2</sub>O (3.0 mL), 100  $^{\circ}\text{C}$ .

<sup>b</sup> Yields of isolated products and determined by <sup>1</sup>H-NMR and <sup>13</sup>C-NMR.

### 1. Methyl 2-acetylpent-4-enoate

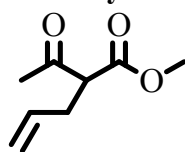

$^1\text{H NMR}$  (400 MHz,  $\text{CDCl}_3$ )  $\delta$  2.18 (s, 3H), 2.51-2.56 (m, 2H), 3.50 (t, 1H), 3.68 (s, 3H), 4.97-5.07 (m, 2H), 5.63-5.73 (m, 1H)

$^{13}\text{C NMR}$  (100 MHz,  $\text{CDCl}_3$ )  $\delta$  29.3, 32.3, 52.5, 59.1, 117.6, 134.2, 169.8, 202.9

$\text{MS (EI) m/z (\%):}$  113 ( $\text{M}^+ - \text{CH}_3\text{CO}$ ), 97, 81, 71, 55, 43 (100)

### Methyl 2-acetyl-2-allylpent-4-enoate

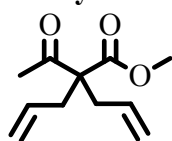

$^1\text{H NMR}$  (400 MHz,  $\text{CDCl}_3$ )  $\delta$  2.14 (s, 3H), 2.56-2.67 (m, 4H), 3.74 (s, 3H), 5.09-5.14 (m, 4H), 5.54-5.65 (m, 2H)

$^{13}\text{C NMR}$  (100 MHz,  $\text{CDCl}_3$ )  $\delta$  27.0, 36.0, 52.4, 63.4, 119.3, 132.2, 171.9, 202.9

$\text{MS (EI) m/z (\%):}$  154 ( $\text{M}^+ - \text{CH}_3\text{CO}$ ), 149, 137, 123, 111, 95, 81, 71, 57, 43 (100)

### 2. Ethyl 2-acetylpent-4-enoate

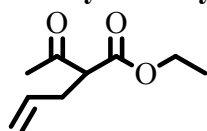

$^1\text{H NMR}$  (400 MHz,  $\text{CDCl}_3$ )  $\delta$  1.22 (t,  $J = 7.1\text{Hz}$ , 3H), 2.18 (s, 3H), 2.54 (quint, 2H), 3.46 (t,  $J = 7.4\text{Hz}$ , 1H), 4.15 (q,  $J = 7.1\text{Hz}$ , 2H), 4.97-5.06 (m, 2H), 5.63-5.74 (m, 1H)

$^{13}\text{C NMR}$  (100 MHz,  $\text{CDCl}_3$ )  $\delta$  14.0, 29.0, 32.0, 59.1, 61.3, 117.3, 134.1, 169.1, 202.3

$\text{MS (EI) m/z (\%):}$  127 ( $\text{M}^+ - \text{CH}_3\text{CO}$ ), 99, 81, 55, 43 (100)

### Ethyl 2-acetyl-2-allylpent-4-enoate

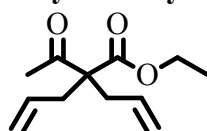

$^1\text{H NMR}$  (400 MHz,  $\text{CDCl}_3$ )  $\delta$  1.27 (t,  $J = 7.1\text{Hz}$ , 3H), 2.14 (s, 3H), 2.61 (quint, 4H), 4.20 (q,  $J = 7.1\text{Hz}$ , 2H), 5.08-5.13 (m, 4H), 5.55-5.65 (m, 2H)

$^{13}\text{C NMR}$  (100 MHz,  $\text{CDCl}_3$ )  $\delta$  14.2, 26.9, 35.9, 61.4, 63.2, 118.2, 132.2, 172.1, 203.8

$\text{MS (EI) m/z (\%):}$  168 ( $\text{M}^+ - \text{CH}_3\text{CO}$ ), 123, 95, 79, 67, 43 (100)

### 3. Isopropyl 2-acetylpent-4-enoate

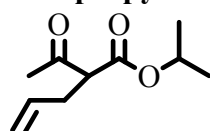

$^1\text{H NMR}$  (400 MHz,  $\text{CDCl}_3$ )  $\delta$  1.25 (d, 6H), 2.24 (s, 3H), 2.59 (quint, 2H), 2.47-2.51 (m, 1H), 5.04-5.13 (m, 3H), 5.70-5.80 (m, 1H)

$^{13}\text{C NMR}$  (100 MHz,  $\text{CDCl}_3$ )  $\delta$  21.8, 29.1, 32.2, 59.5, 69.2, 117.5, 134.3, 168.9, 202.4

$\text{MS (EI) m/z (\%):}$  141 ( $\text{M}^+ - \text{CH}_3\text{CO}$ ), 124, 99, 92, 82, 71, 57, 43 (100)

### Isopropyl 2-acetyl-2-allylpent-4-enoate

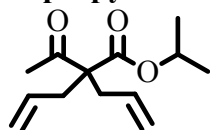

$^1\text{H NMR}$  (400 MHz,  $\text{CDCl}_3$ )  $\delta$  1.25 (d, 6H), 2.13 (s, 3H), 2.55-2.67 (m, 4H), 5.05-5.13 (m, 5H), 5.55-5.65 (m, 2H)

$^{13}\text{C NMR}$  (100 MHz,  $\text{CDCl}_3$ )  $\delta$  21.7, 26.9, 35.9, 63.1, 69.1, 119.3, 132.3, 171.6, 204.0

**MS** (EI)  $m/z$  (%): 180 ( $\text{M}^+ - \text{CH}_3\text{CO}$ ), 178, 169, 149, 123, 95, 79, 57, 44 (100)

### 4. Isobutyl 2-acetylpent-4-enoate

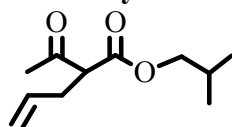

$^1\text{H NMR}$  (400 MHz,  $\text{CDCl}_3$ )  $\delta$  0.93 (d, 6H), 1.90-2.00 (m, 1H), 2.25 (s, 3H), 2.55-2.66 (m, 2H), 3.55 (t, 2H), 3.92 (d, 2H), 5.04-5.13 (m, 2H), 5.70-5.80 (m, 1H)

$^{13}\text{C NMR}$  (100 MHz,  $\text{CDCl}_3$ )  $\delta$  19.1, 27.8, 29.3, 32.2, 59.3, 71.6, 117.6, 134.3, 169.4, 202.5

**MS** (EI)  $m/z$  (%): 155 ( $\text{M}^+ - \text{CH}_3\text{CO}$ ), 142, 124, 109, 99, 82, 57, 43 (100)

### Isobutyl 2-acetyl-2-allylpent-4-enoate

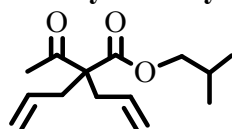

$^1\text{H NMR}$  (400 MHz,  $\text{CDCl}_3$ )  $\delta$  0.93 (d, 6H), 1.88-1.98 (m, 1H), 2.14 (s, 3H), 2.56-2.69 (m, 4H), 3.90 (d, 2H), 5.08-5.13 (m, 4H), 5.54-5.65 (m, 2H)

$^{13}\text{C NMR}$  (100 MHz,  $\text{CDCl}_3$ )  $\delta$  19.3, 26.9, 27.6, 36.0, 63.4, 71.7, 119.3, 132.1, 173.3, 203.8

**MS** (EI)  $m/z$  (%): 141 ( $\text{M}^+ - \text{CH}_3\text{CO}$ ), 123, 95, 79, 57, 43 (100)

### 5. Ethyl 2-allyl-2-benzoylpent-4-enoate

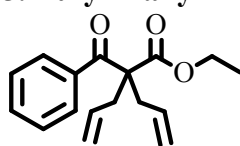

$^1\text{H NMR}$  (400 MHz,  $\text{CDCl}_3$ )  $\delta$  1.08 (t,  $J = 7.1\text{Hz}$ , 3H), 2.81 (m, 4H), 4.13 (q,  $J = 7.1\text{Hz}$ , 2H), 5.00-5.09 (m, 4H), 5.53-5.64 (m, 2H), 7.40-7.54 (m, 3H), 7.83-7.85 (m, 2H)

$^{13}\text{C NMR}$  (100 MHz,  $\text{CDCl}_3$ )  $\delta$  13.9, 37.2, 60.6, 61.5, 119.1, 128.5, 128.6, 132.0, 132.8, 136.0, 172.7, 196.2

**MS** (EI)  $m/z$  (%): 272 ( $\text{M}^+$ ), 198, 159, 105 (100), 77

### 6. Ethyl 2-acetyl-2-methylpent-4-enoate

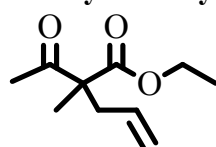

$^1\text{H NMR}$  (400 MHz,  $\text{CDCl}_3$ )  $\delta$  1.20 (t,  $J = 7.1\text{Hz}$ , 3H), 1.26 (s, 3H), 2.08 (s, 3H), 2.41-2.60 (m, 2H), 4.13 (q,  $J = 7.1\text{Hz}$ , 2H), 4.97-5.09 (m, 2H), 5.53-5.64 (m, 1H)

$^{13}\text{C NMR}$  (100 MHz,  $\text{CDCl}_3$ )  $\delta$  14.1, 18.9, 26.2, 39.4, 59.4, 61.4, 119.0, 132.7, 172.5, 204.8

**MS** (EI)  $m/z$  (%): 142, 114, 97, 69, 43 (100)

7. 2-allyl-2-methylcyclopentane-1, 3-dione

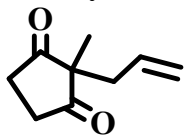

$^1\text{H NMR}$  (400 MHz,  $\text{CDCl}_3$ )  $\delta$  1.11 (s, 3H), 2.33-2.05 (m, 2H), 2.65-2.82 (m, 4H), 5.04-5.08 (m, 2H), 5.54-5.65 (m, 1H)

$^{13}\text{C NMR}$  (100 MHz,  $\text{CDCl}_3$ )  $\delta$  19.2, 36.8, 40.4, 57.1, 120.2, 131.9, 289.1

$\text{MS}$  (EI)  $m/z$  (%): 152 ( $\text{M}^+$ ), 124, 111, 97 (100), 55, 41

8. Table 2 entry 21 (Mono-)

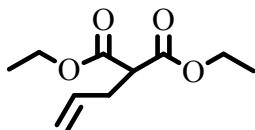

$^1\text{H NMR}$  (400 MHz,  $\text{CDCl}_3$ )  $\delta$  1.19 (t, 6H), 2.56 (m,  $J = 7.2\text{Hz}$ , 2H), 3.35 (t,  $J = 7.5\text{Hz}$ , 1H), 4.12 (quint,  $J = 3.9\text{Hz}$ , 4H), 4.93-5.10 (m, 2H), 5.66-5.76 (m, 1H)

$^{13}\text{C NMR}$  (100 MHz,  $\text{CDCl}_3$ )  $\delta$  14.1, 32.8, 51.6, 61.3, 117.4, 134.1, 168.9

$\text{MS}$  (EI)  $m/z$  (%): 155 ( $\text{M}^+ - \text{OCH}_2\text{CH}_3$ ), 149, 127, 109, 98 (100), 81, 67, 55, 44



# Copies of $^1\text{H}$ -NMR, $^{13}\text{C}$ -NMR

## Methyl 2-acetylpent-4-enoate

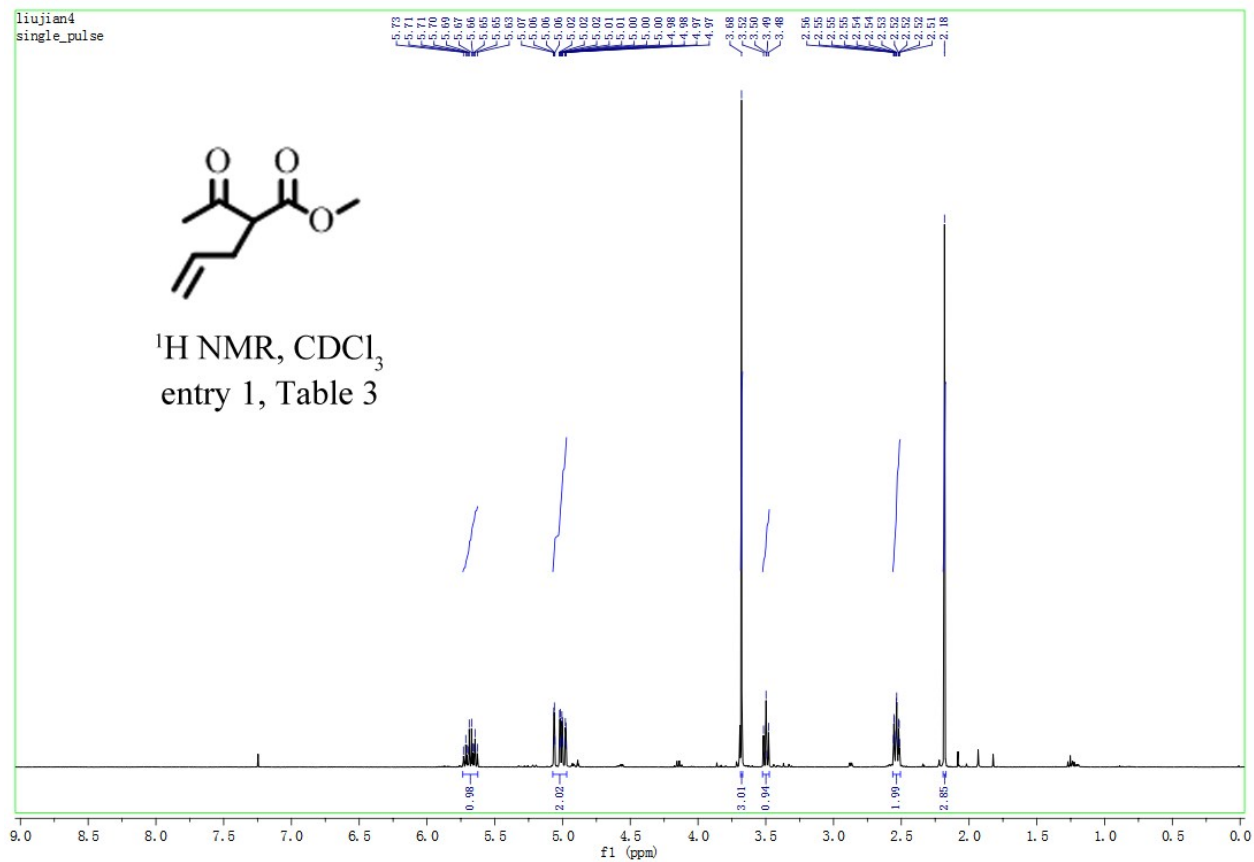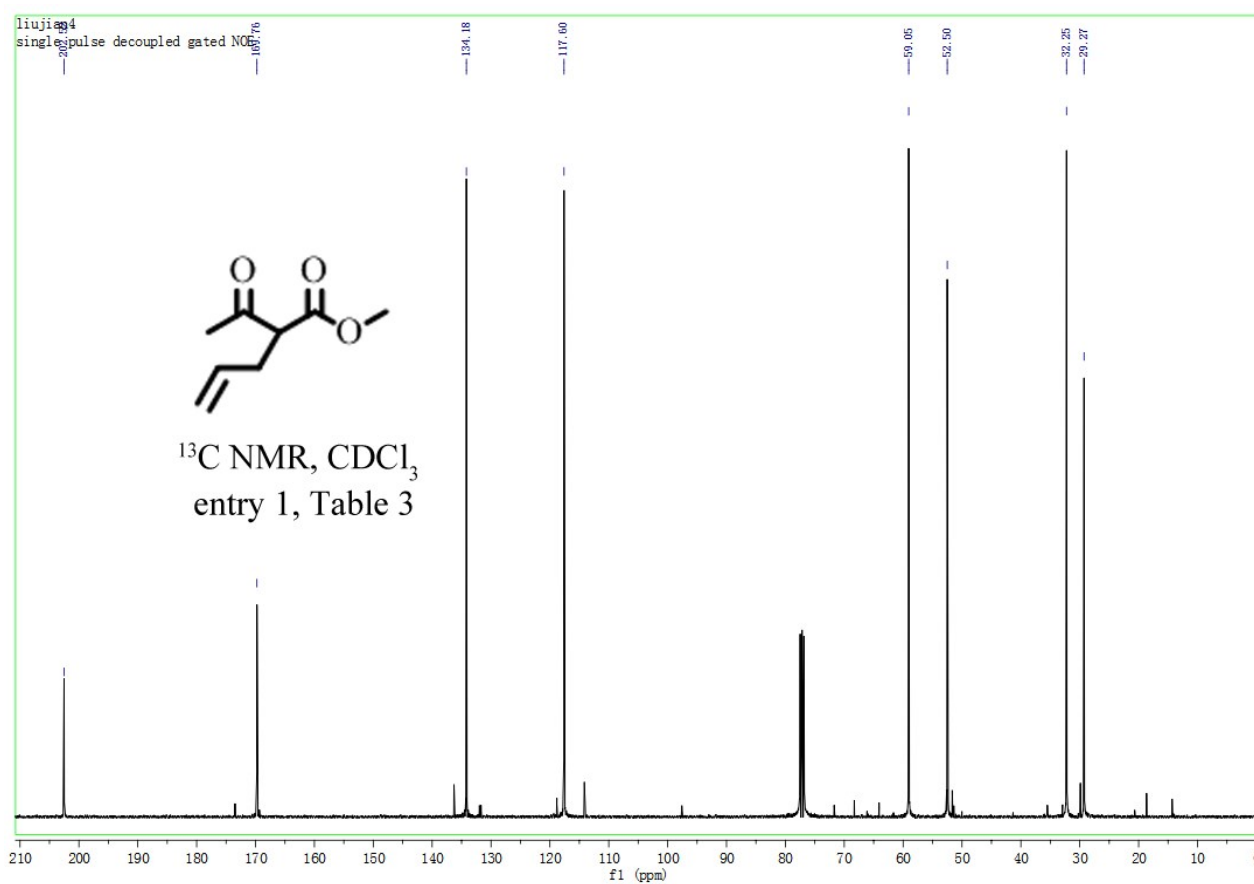

# Methyl 2-acetyl-2-allylpent-4-enoate

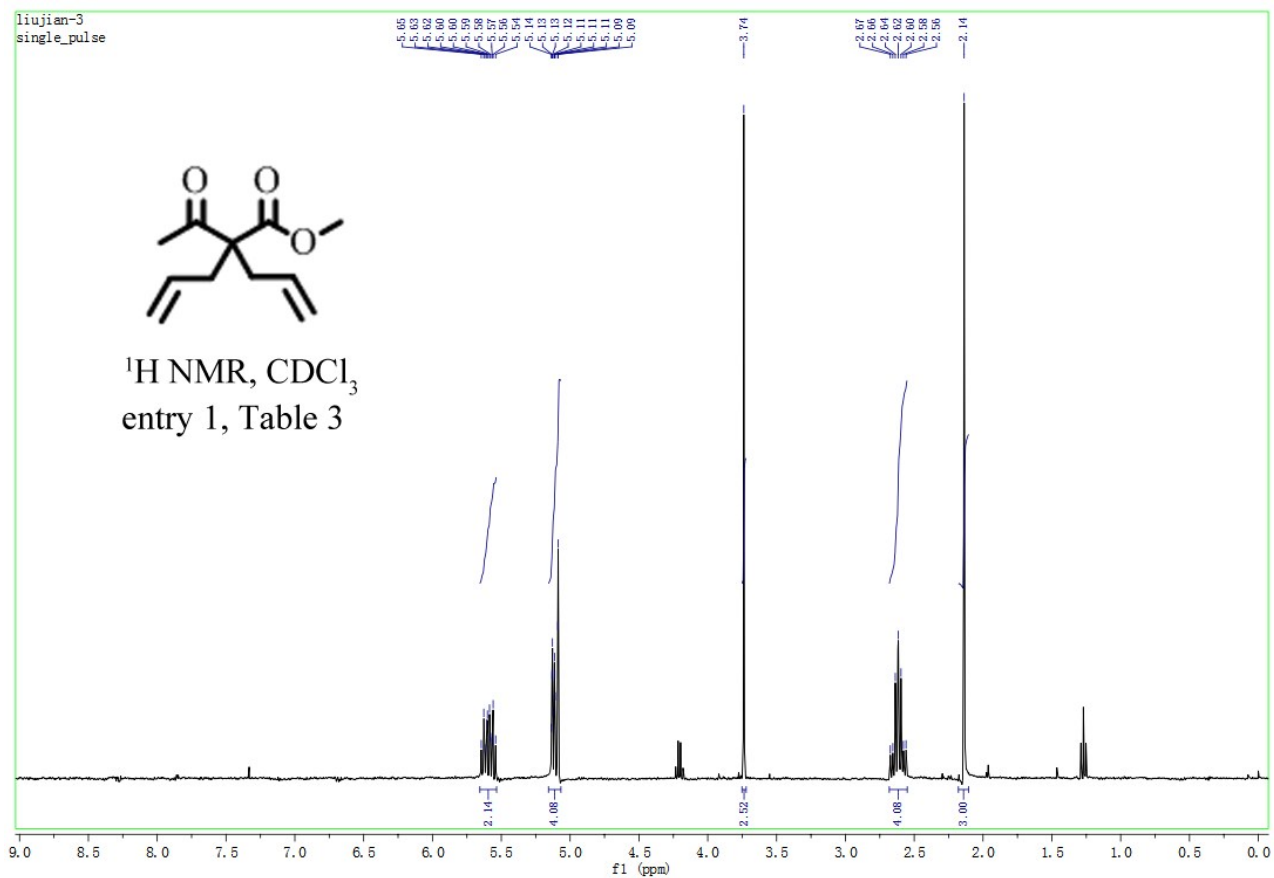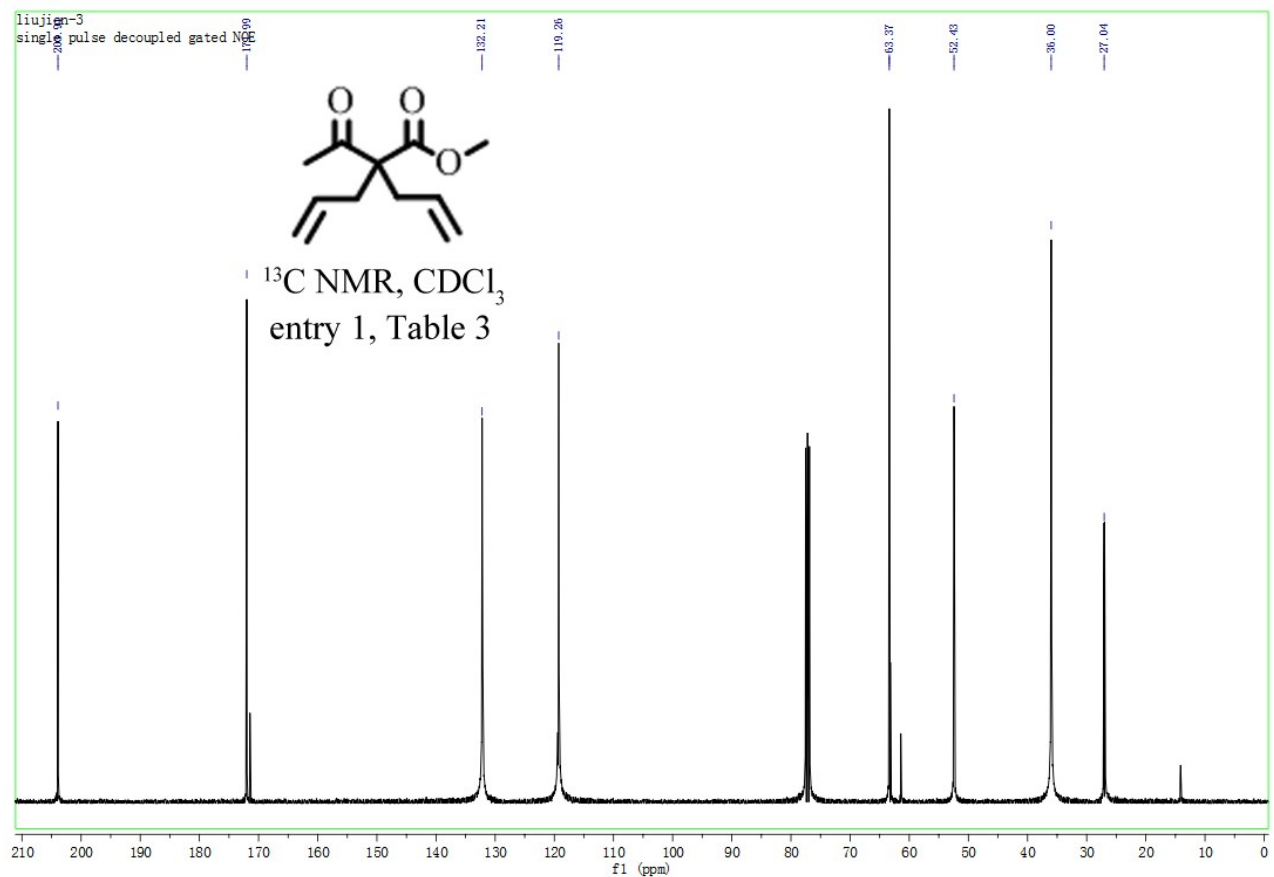

# Ethyl 2-acetylpent-4-enoate

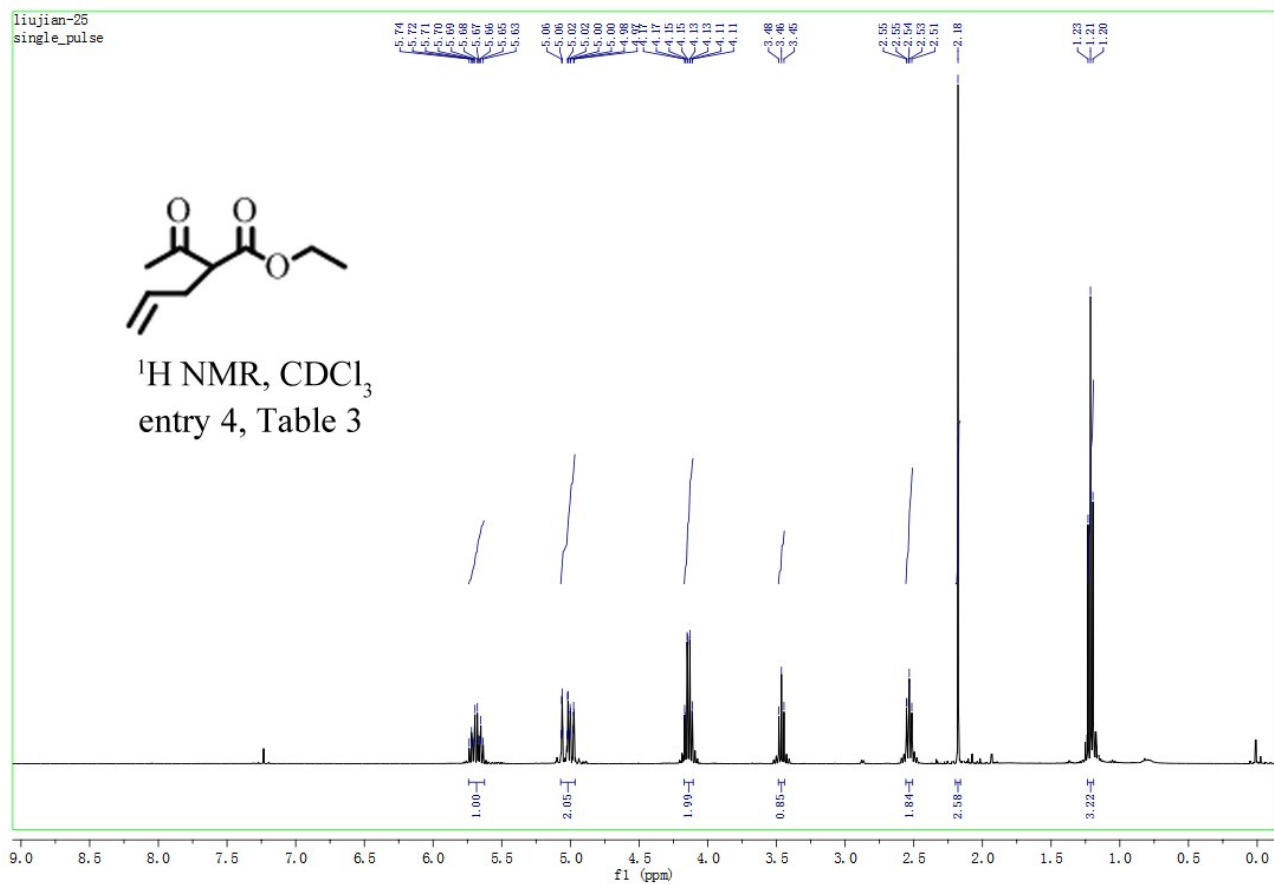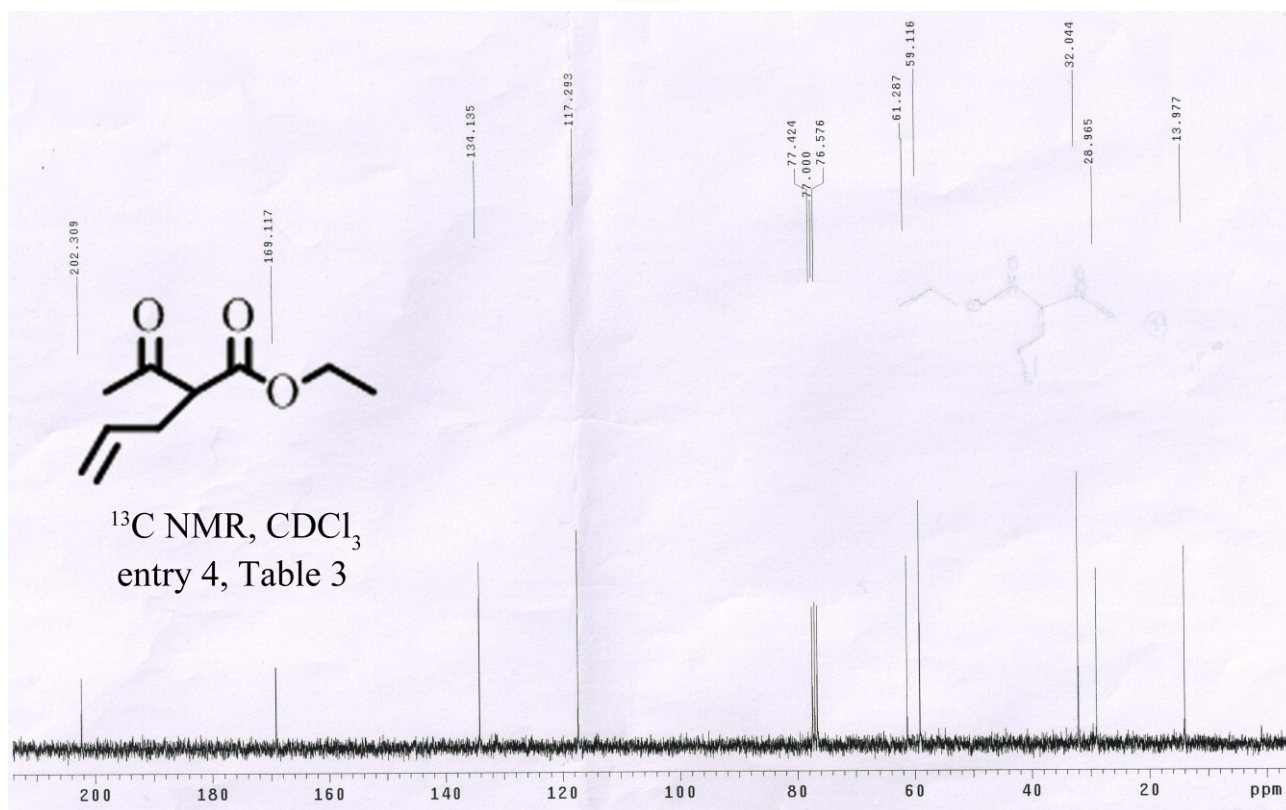

# Ethyl 2-acetyl-2-allylpent-4-enoate

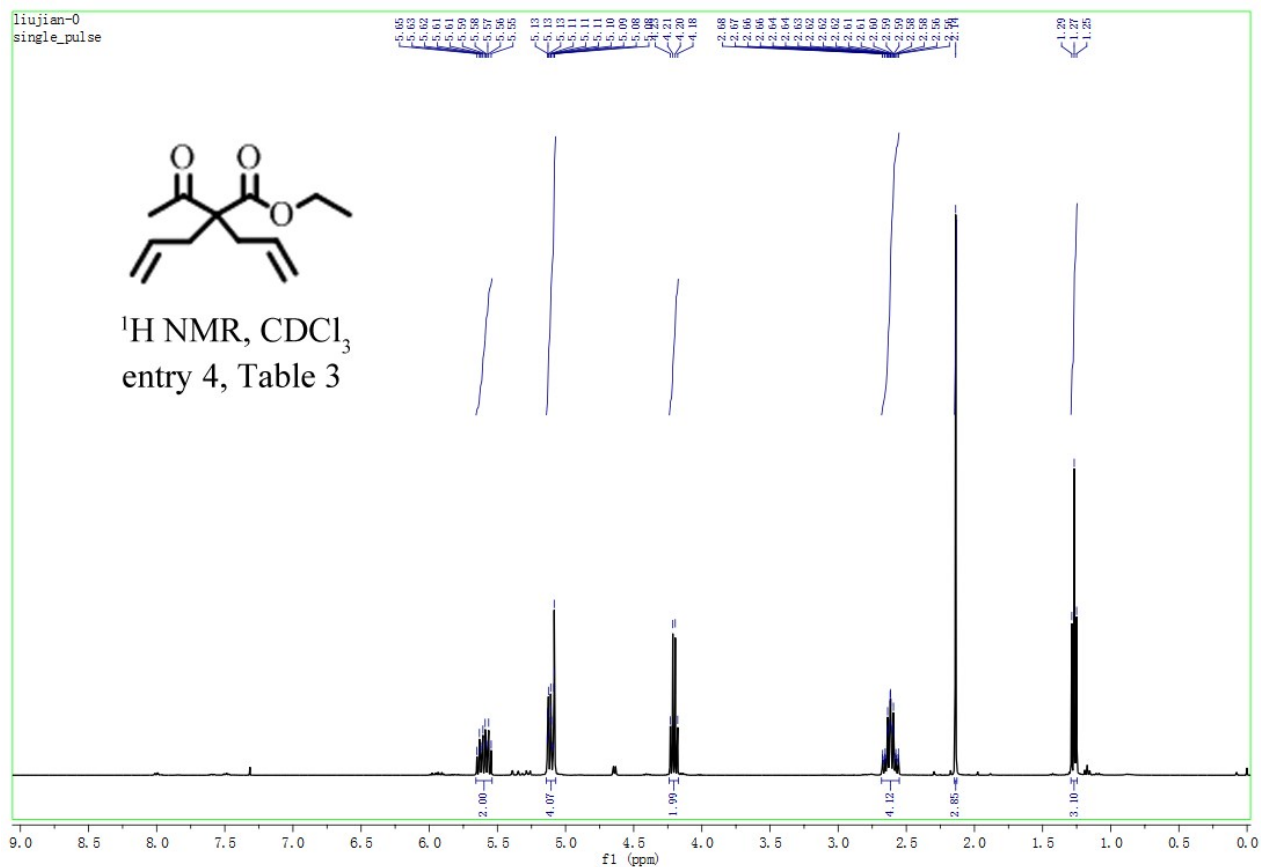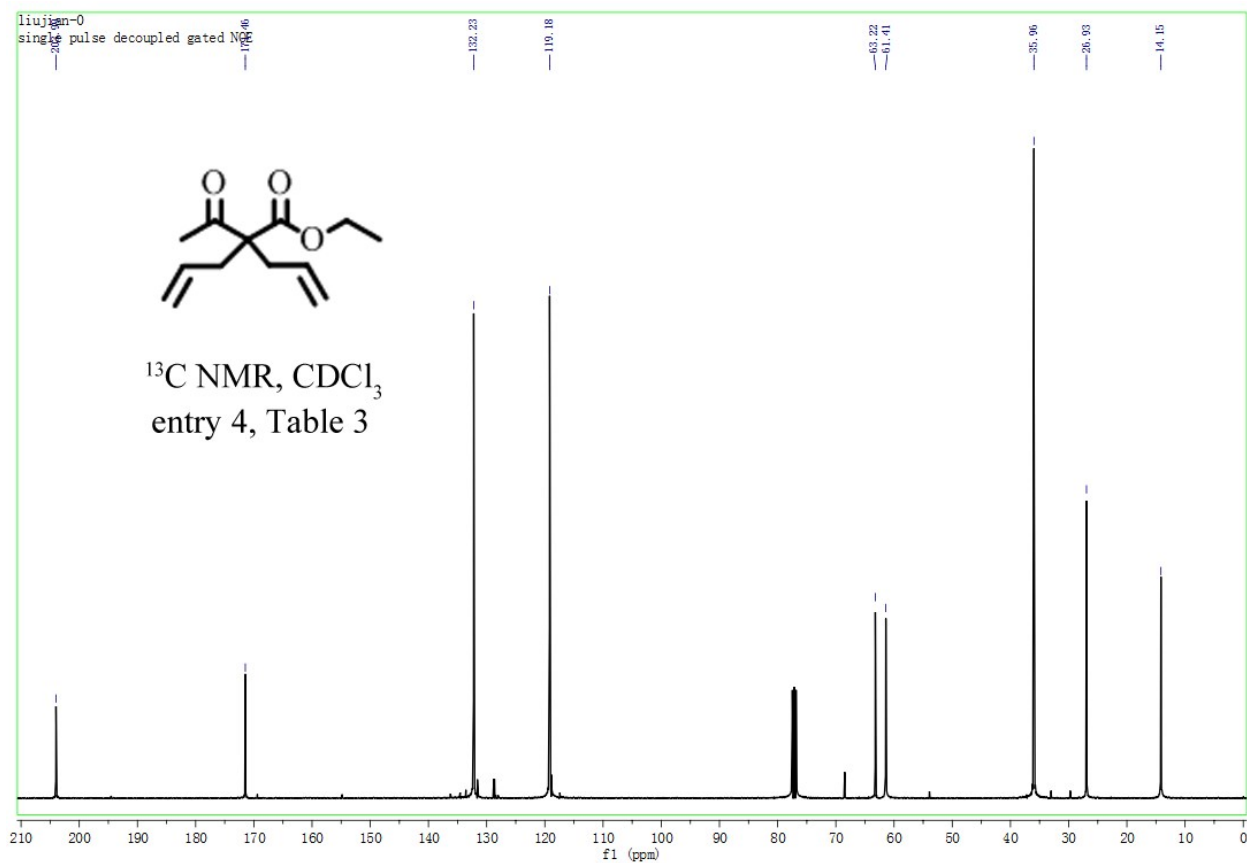

# Isopropyl 2-acetylpent-4-enoate

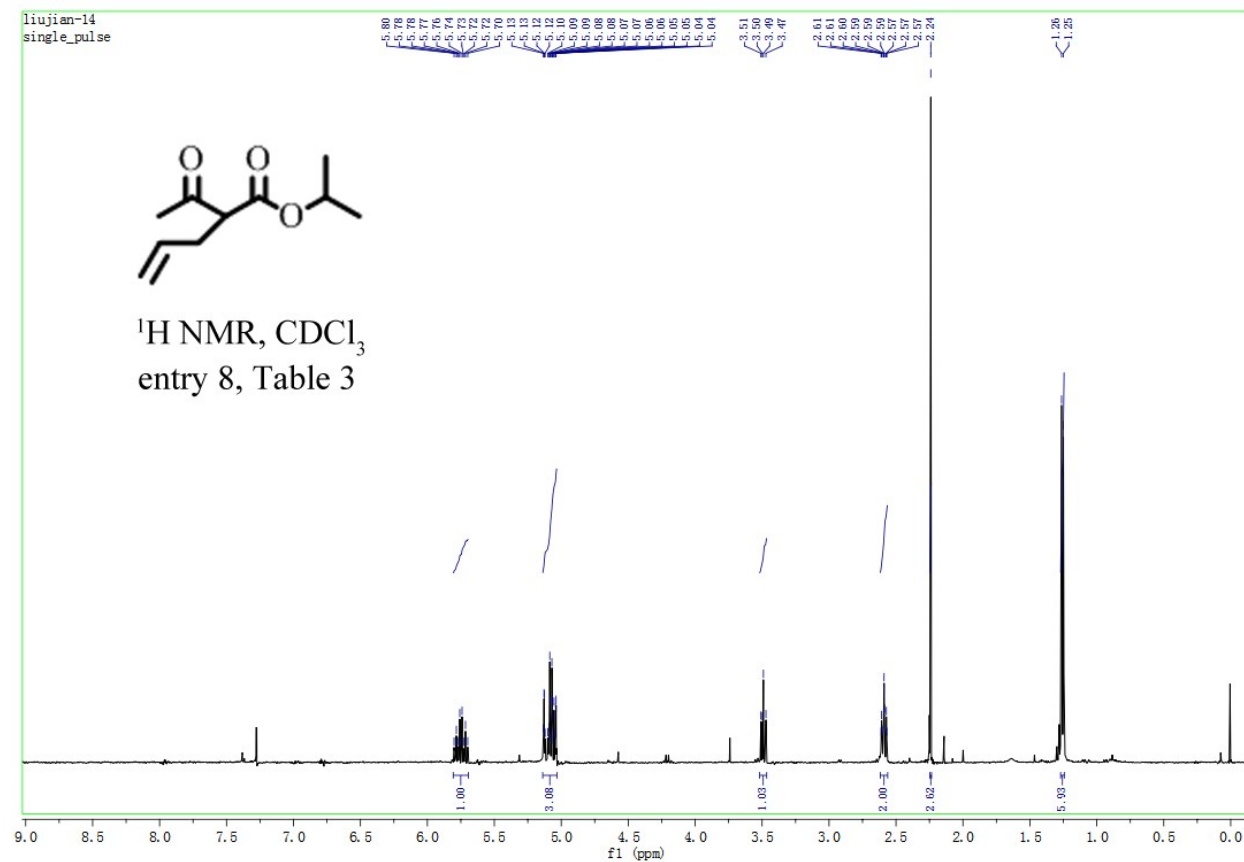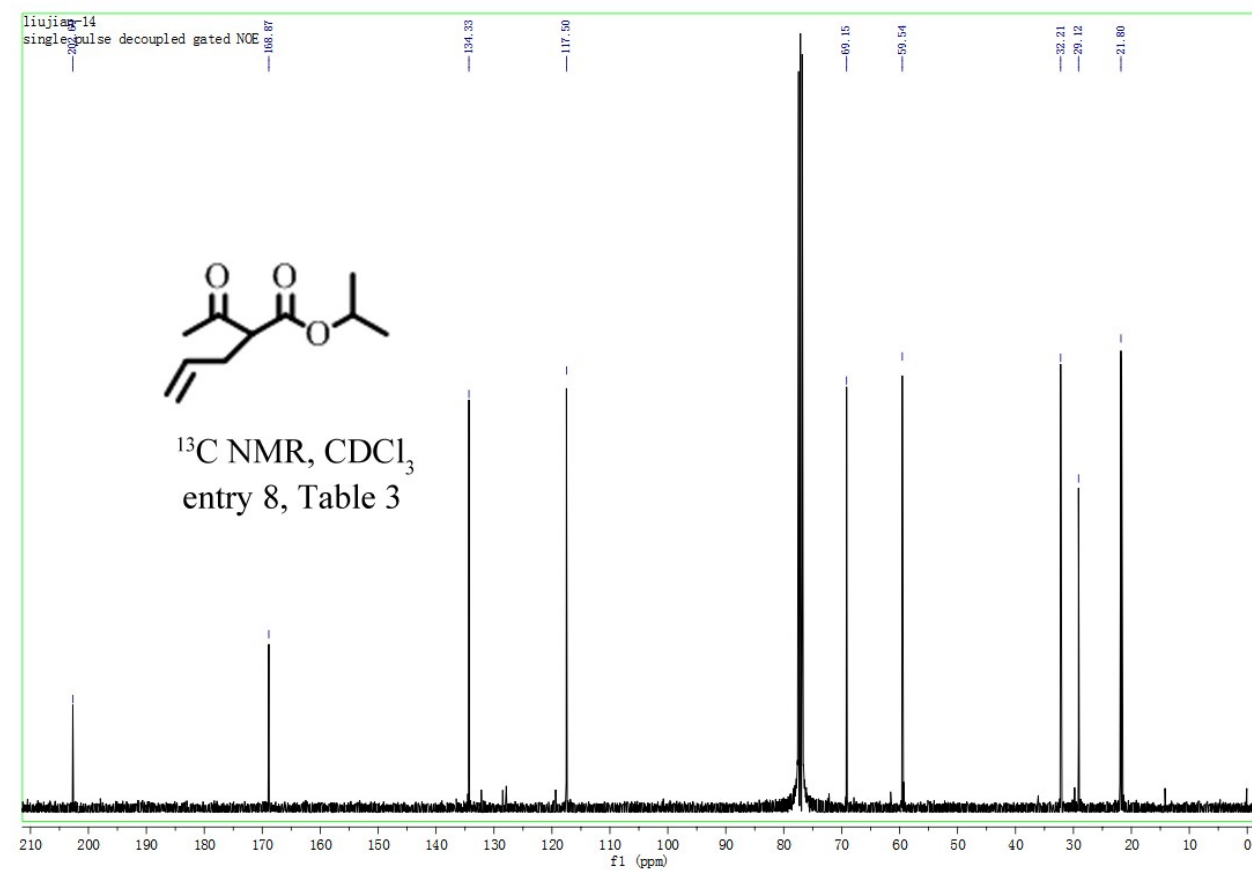



# Isopropyl 2-acetyl-2-allylpent-4-enoate

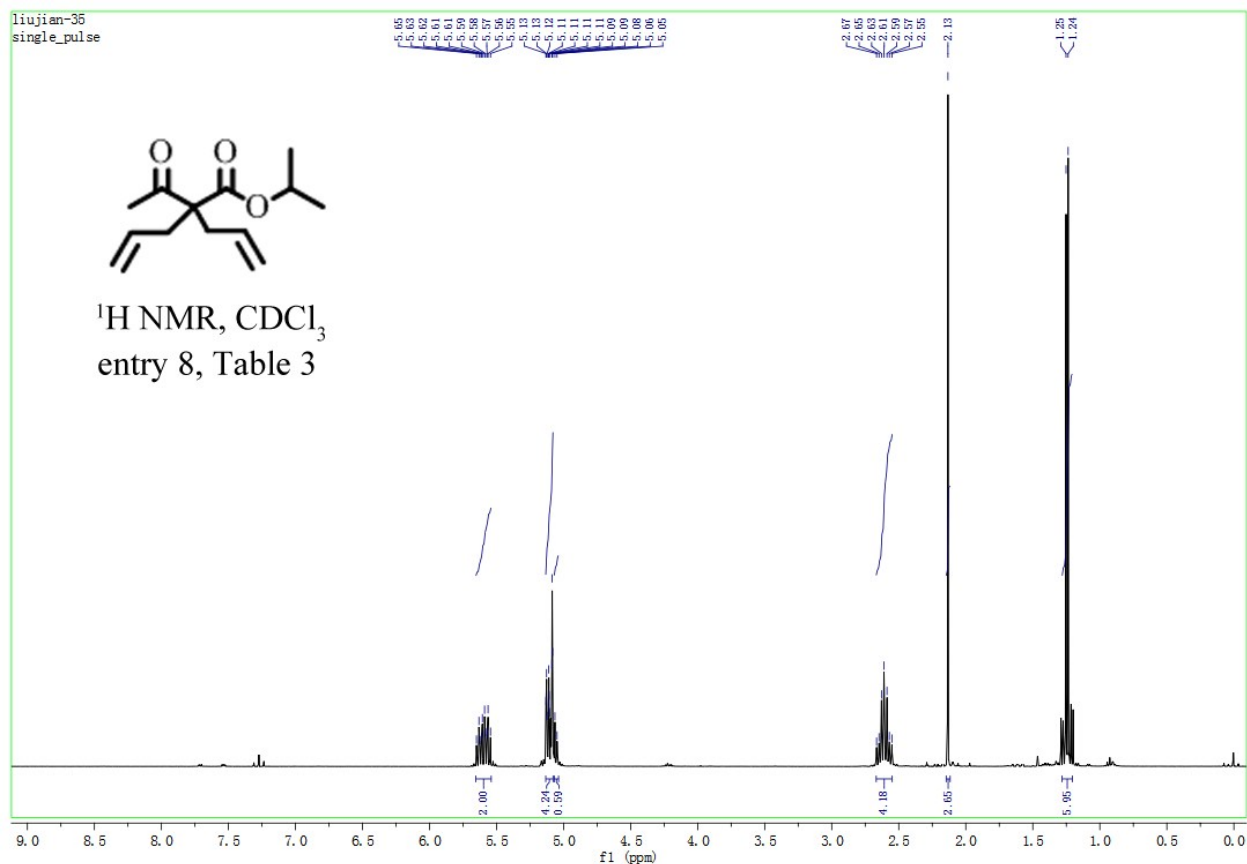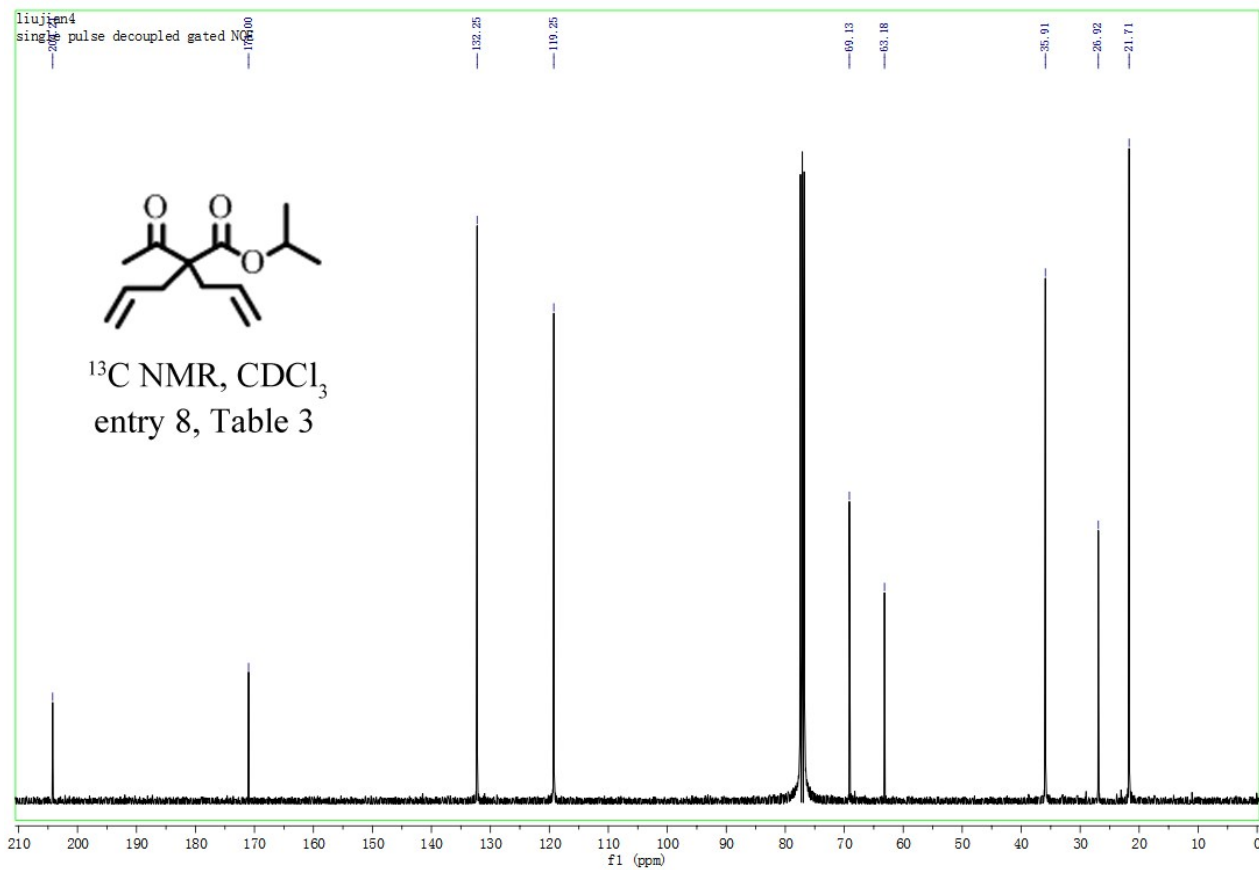

# Isobutyl 2-acetylpent-4-enoate

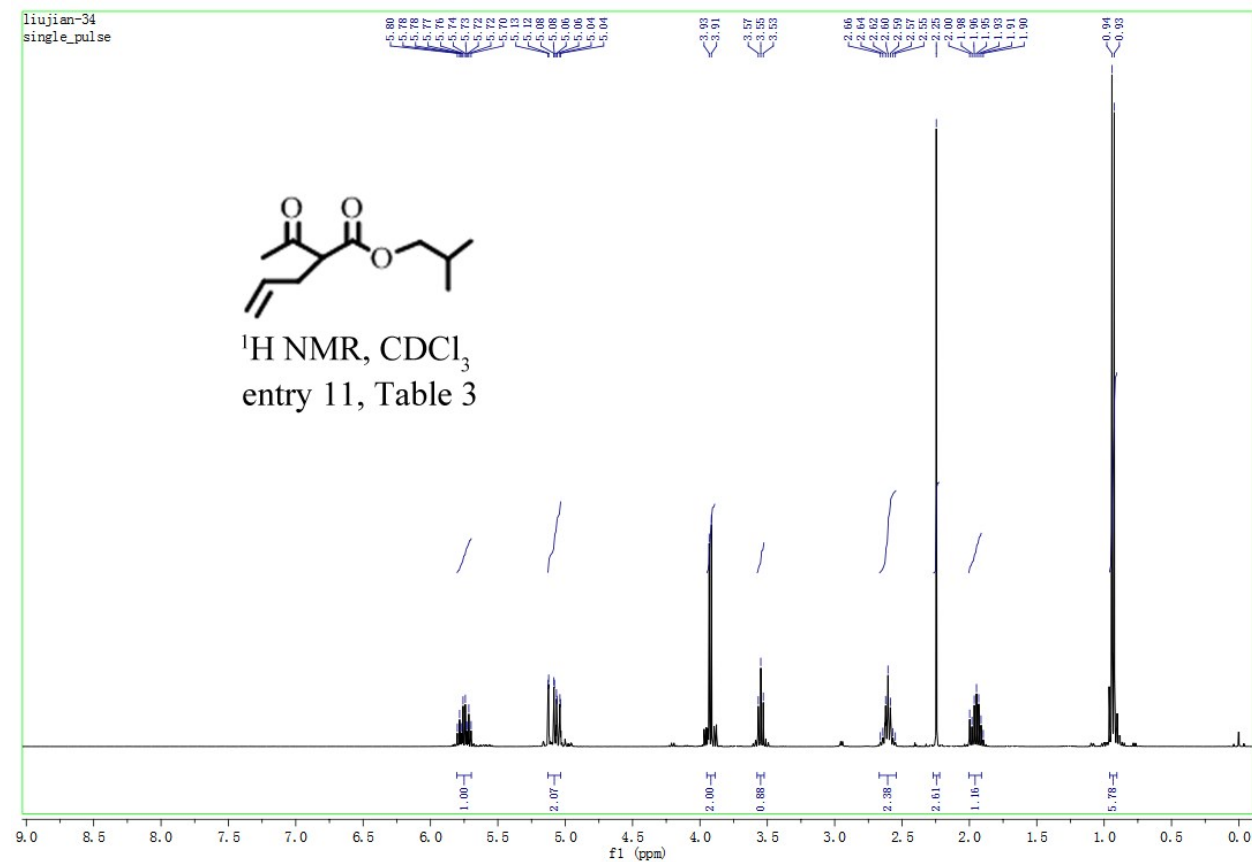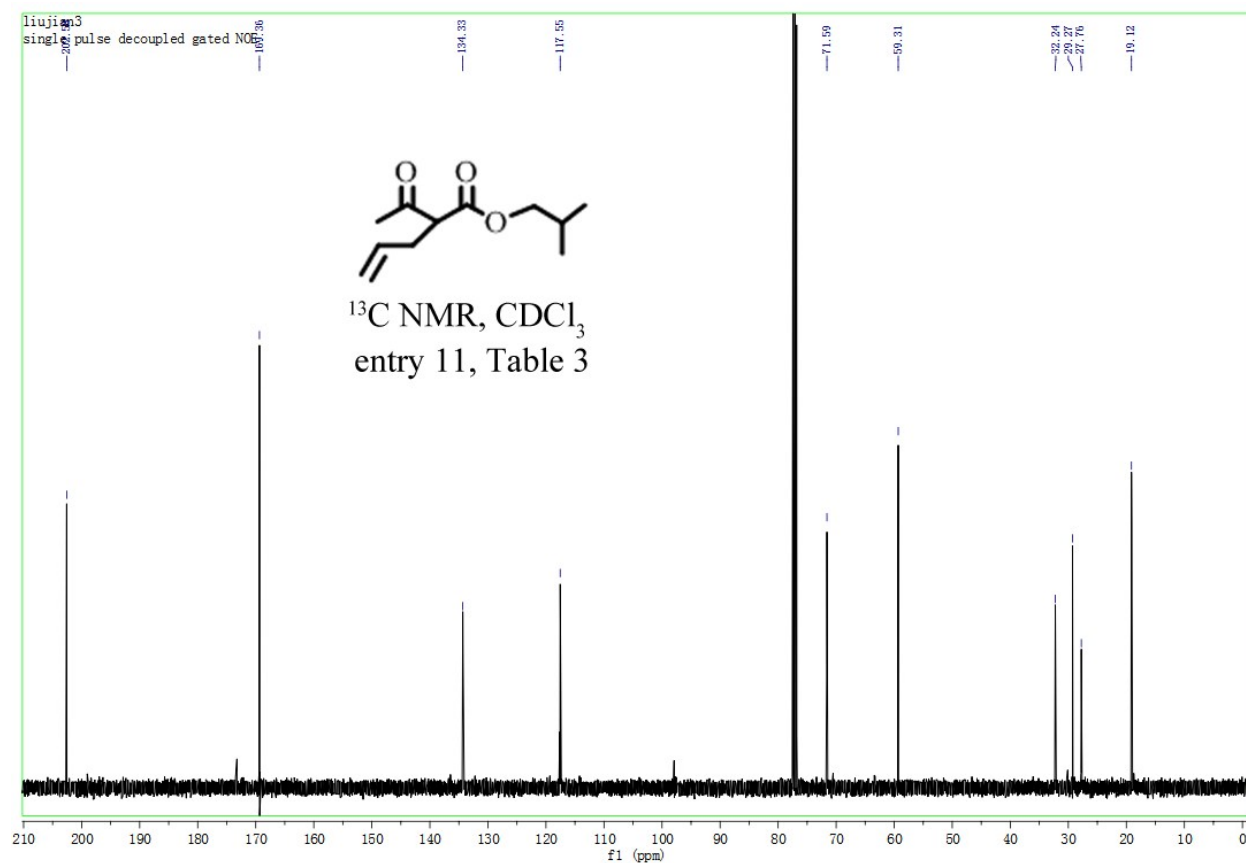

# Isobutyl 2-acetyl-2-allylpent-4-enoate

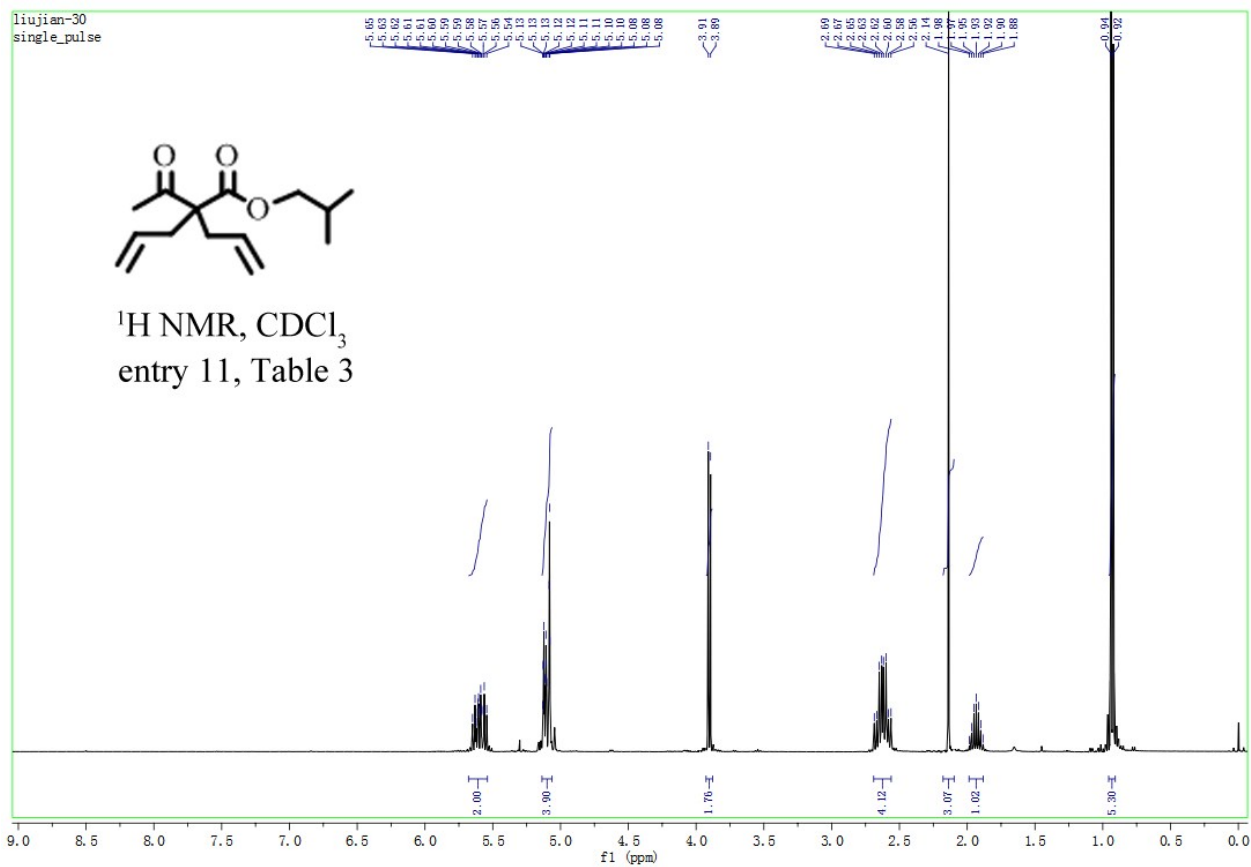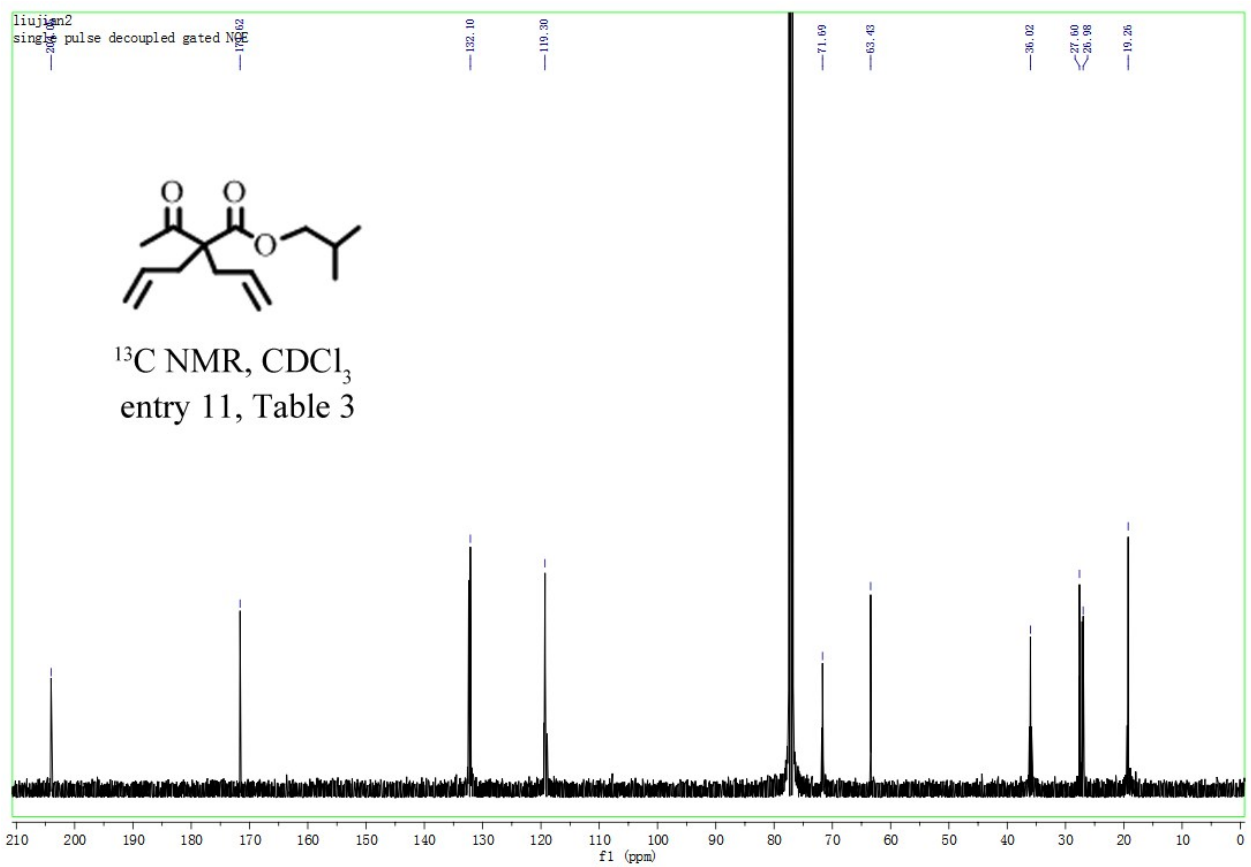

# Ethyl 2-acetyl-2-methylpent-4-enoate

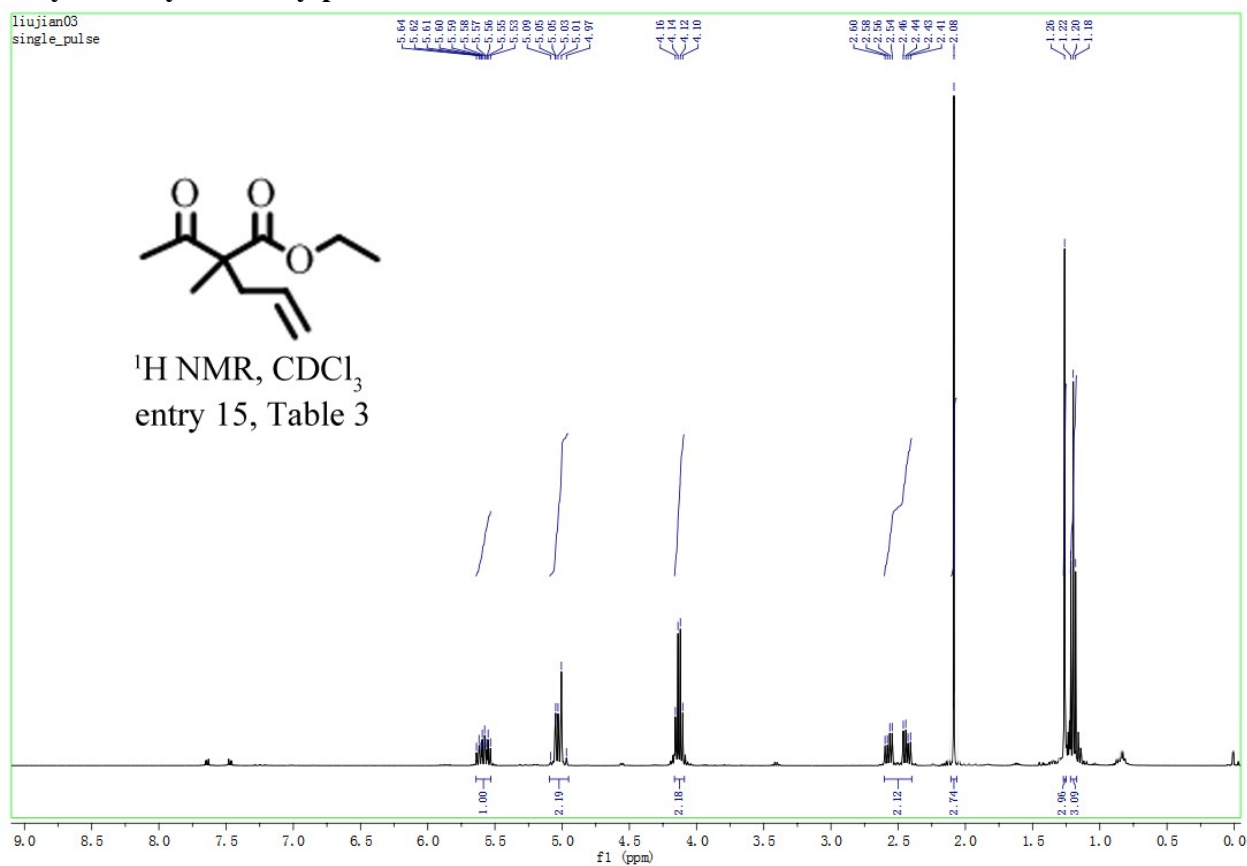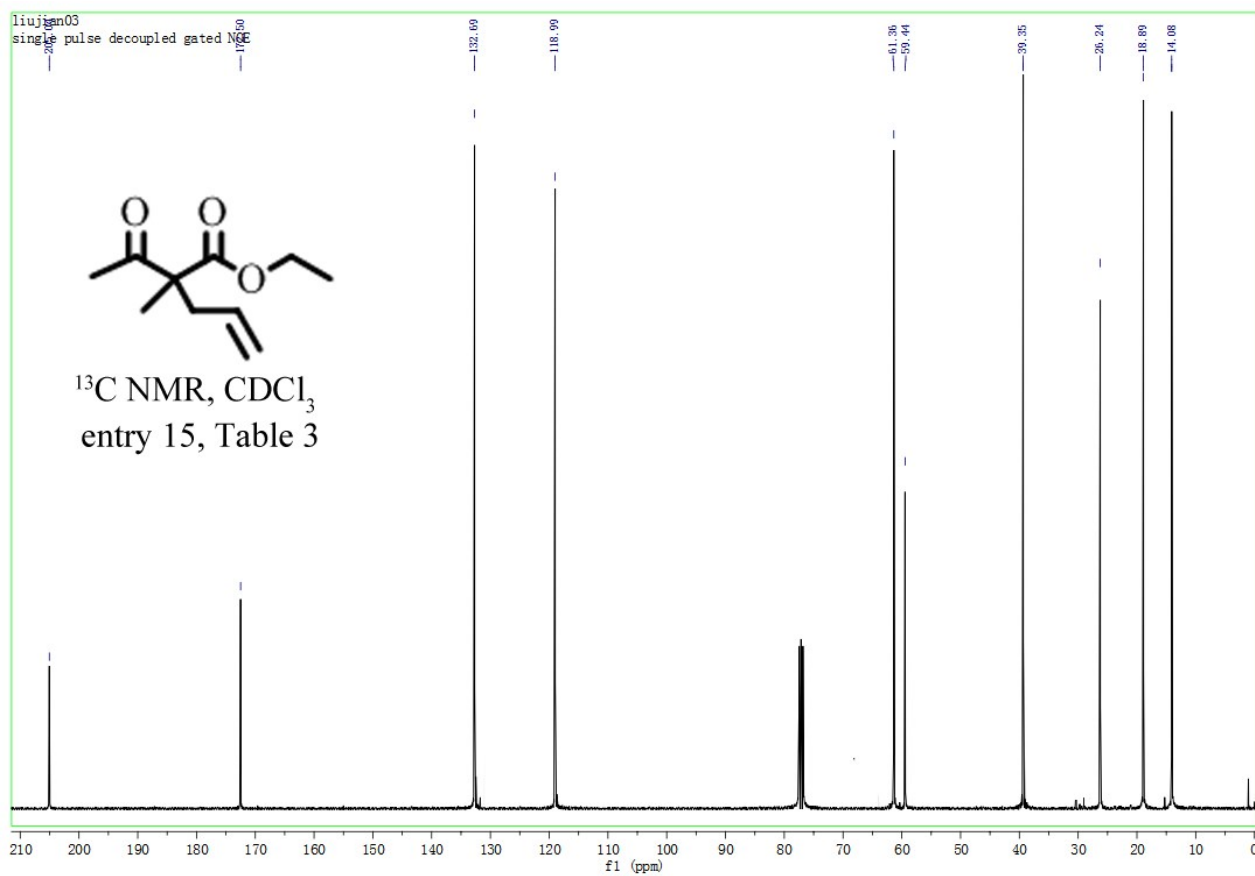

# Ethyl 2-allyl-2-benzoylpent-4-enoate

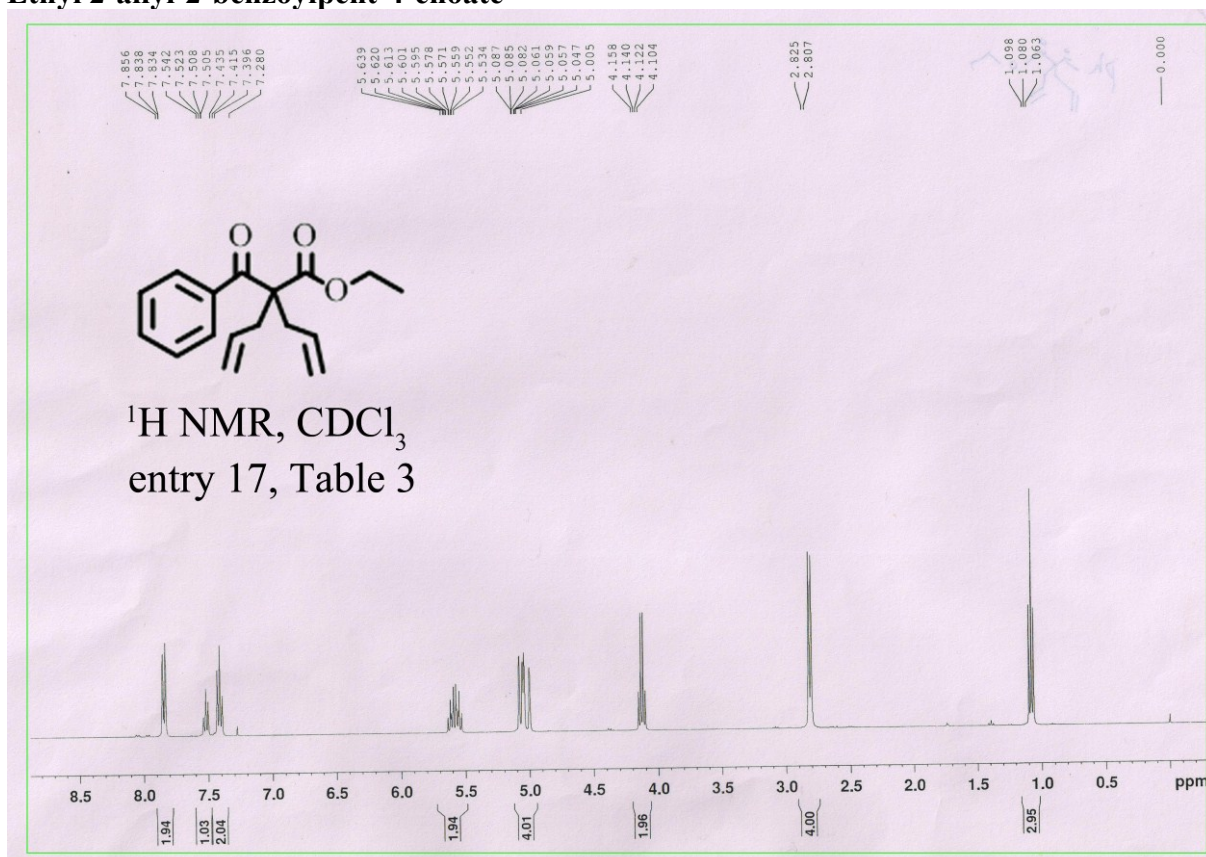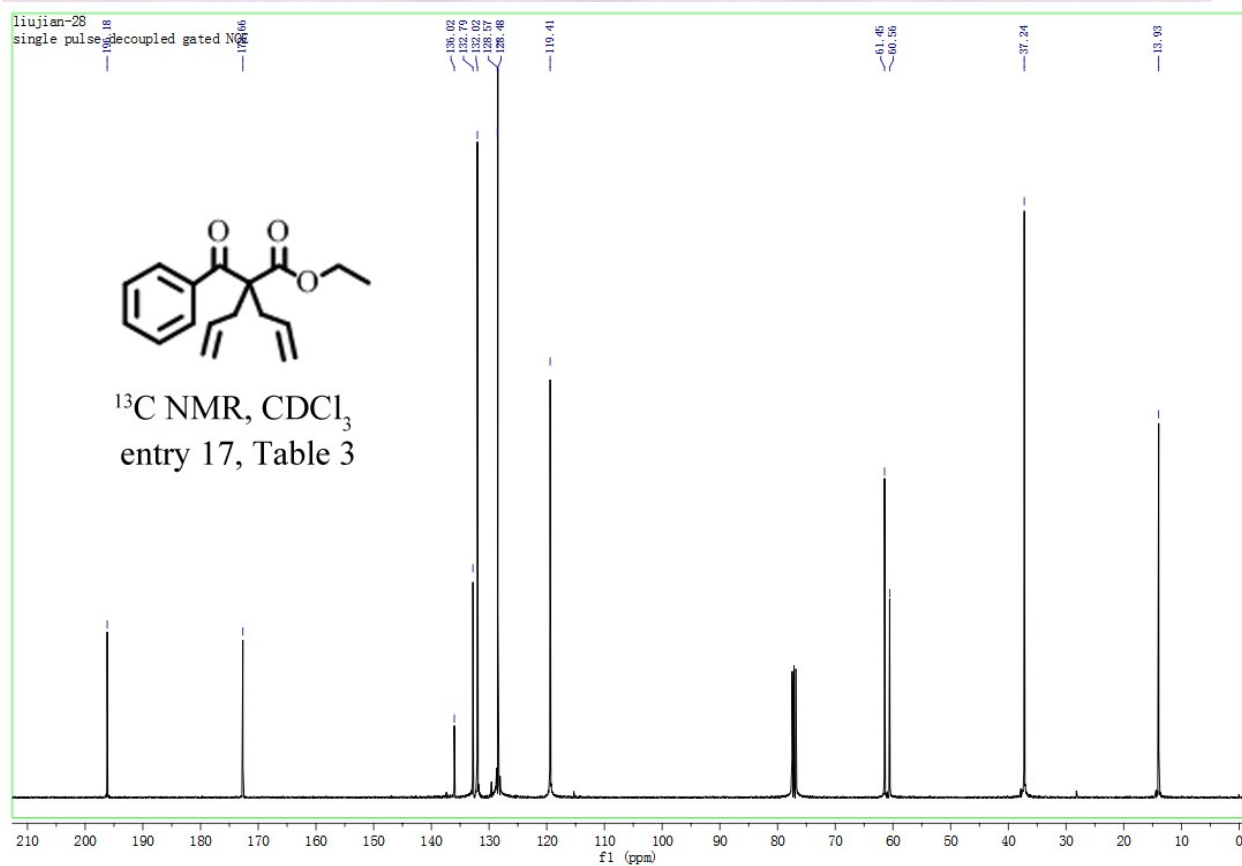



## 2-allyl-2-methylcyclopentane-1,3-dione

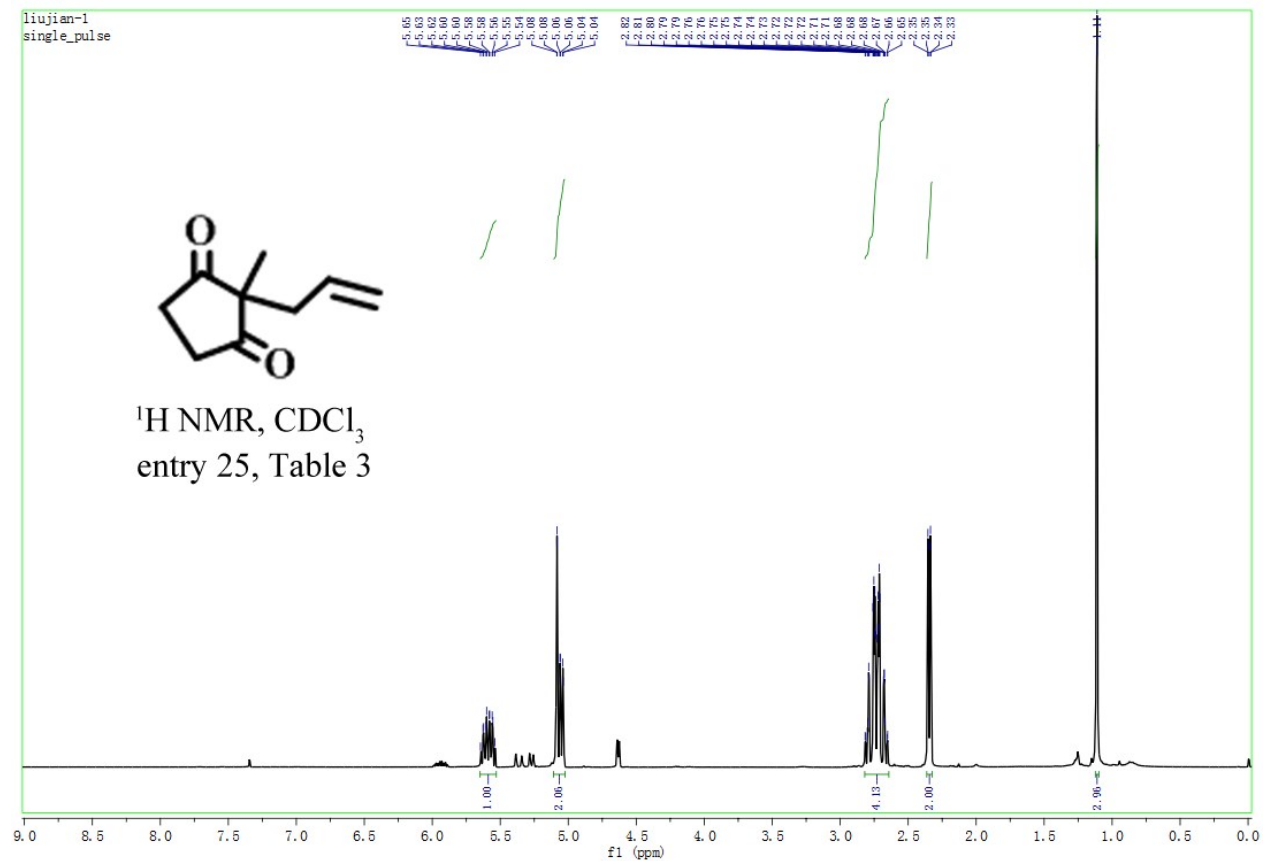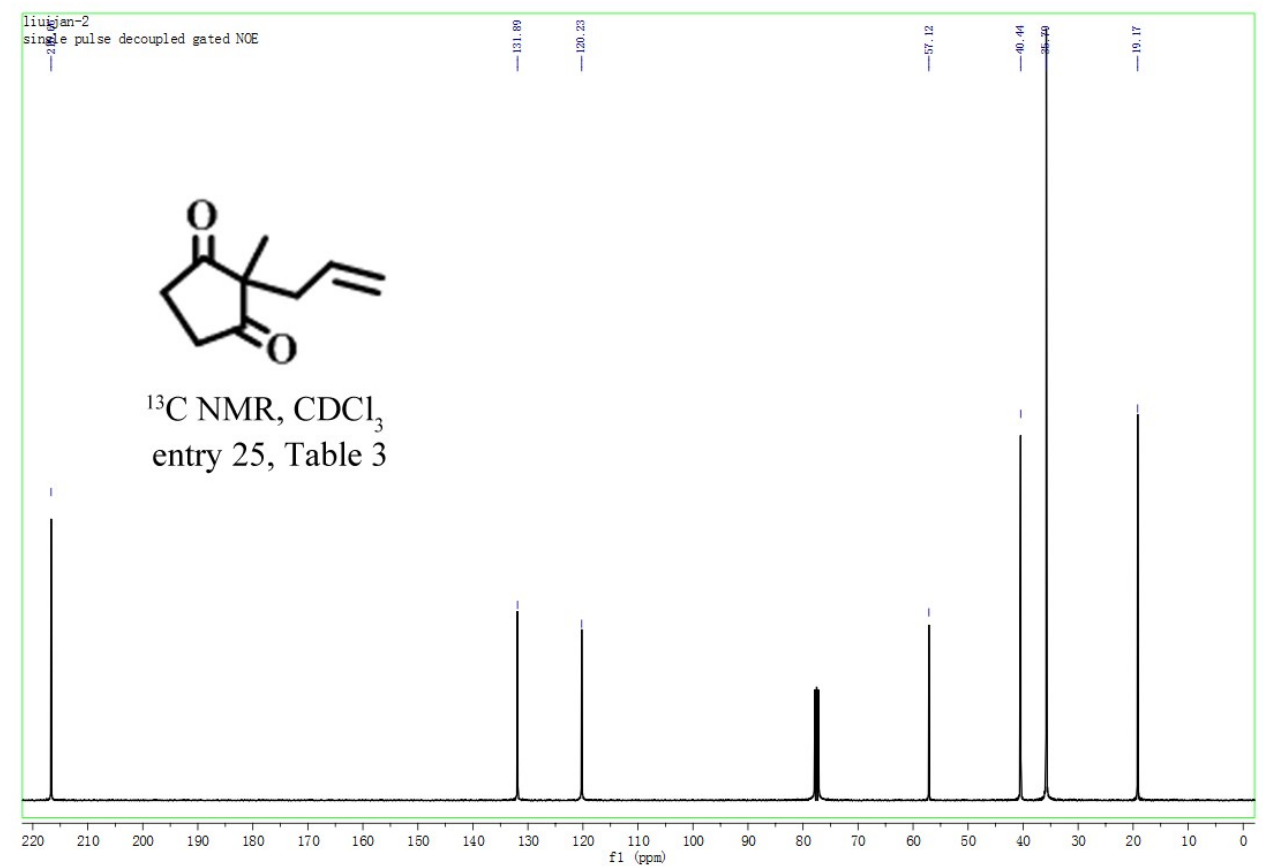

# Diethyl 2-allylmalonate

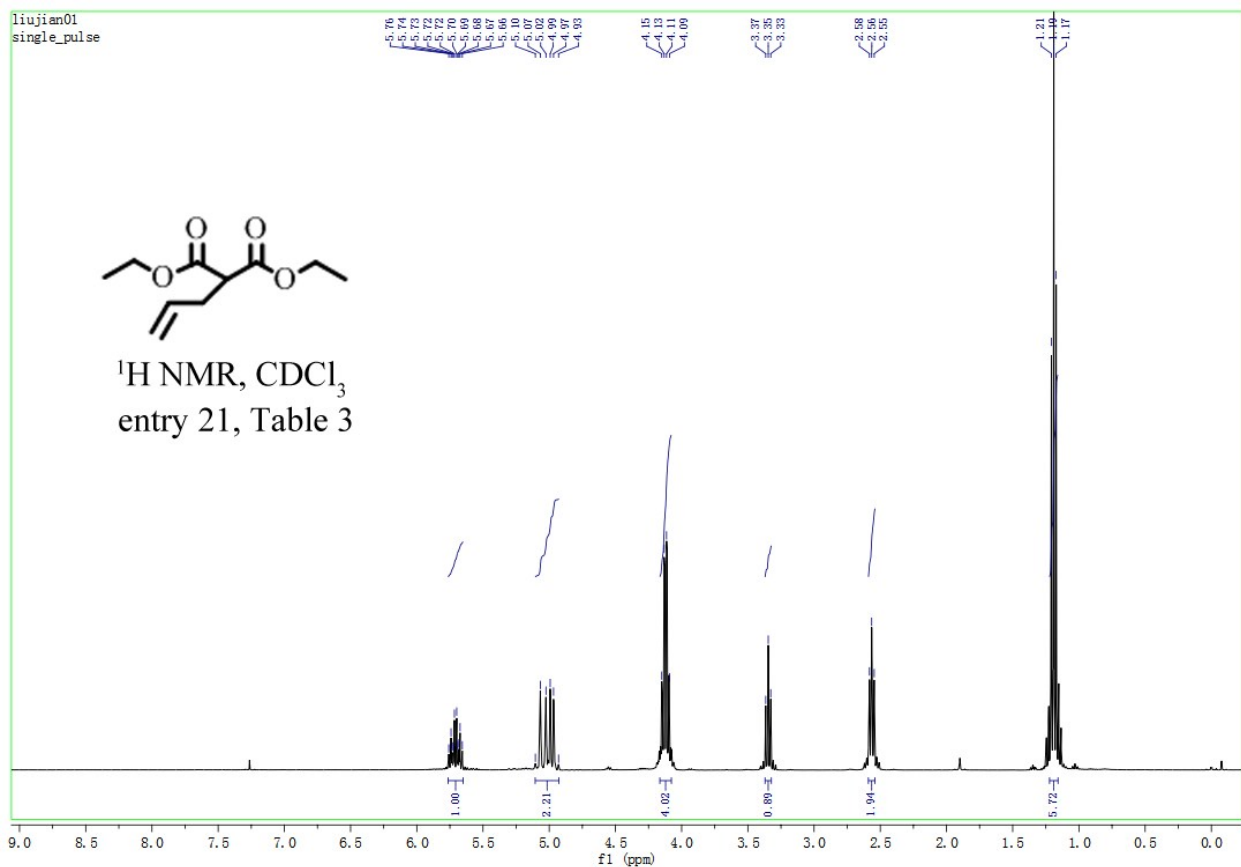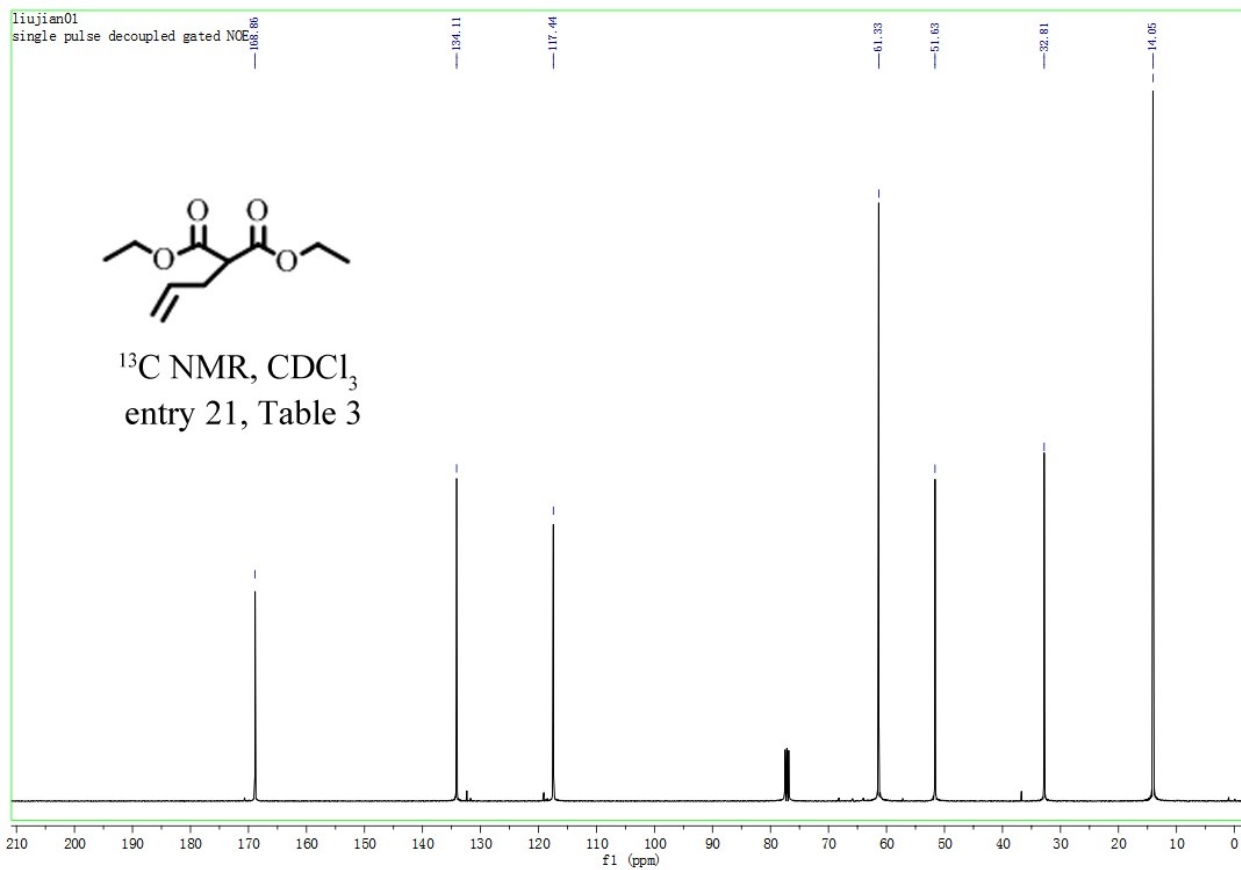

Supplement: c5nr07835k1.pdf [file c5nr07835k1.pdf]
